# Supplementary material for: Atropisomerism in 3-arylthiazolidine-2-thiones. A combined dynamic NMR and dynamic HPLC study
Source: Royal Society of Chemistry journal article supplement (doi:10.1039/c6ob02145j), 2016-01-01
Supplement: c6ob02145j1.pdf [file c6ob02145j1.pdf]

**Atropisomerism in 3-arylthiazolidine-2-thiones. A combined Dynamic NMR and Dynamic HPLC Study.**

A. Ciogli,<sup>\*a</sup> S. Vivek Kumar,<sup>b</sup> M. Mancinelli,<sup>c</sup> A. Mazzanti,<sup>\*c</sup> S. Perumal,<sup>b</sup> C. Severi,<sup>c</sup> and C. Villani<sup>a</sup>

SUPPORTING INFORMATION

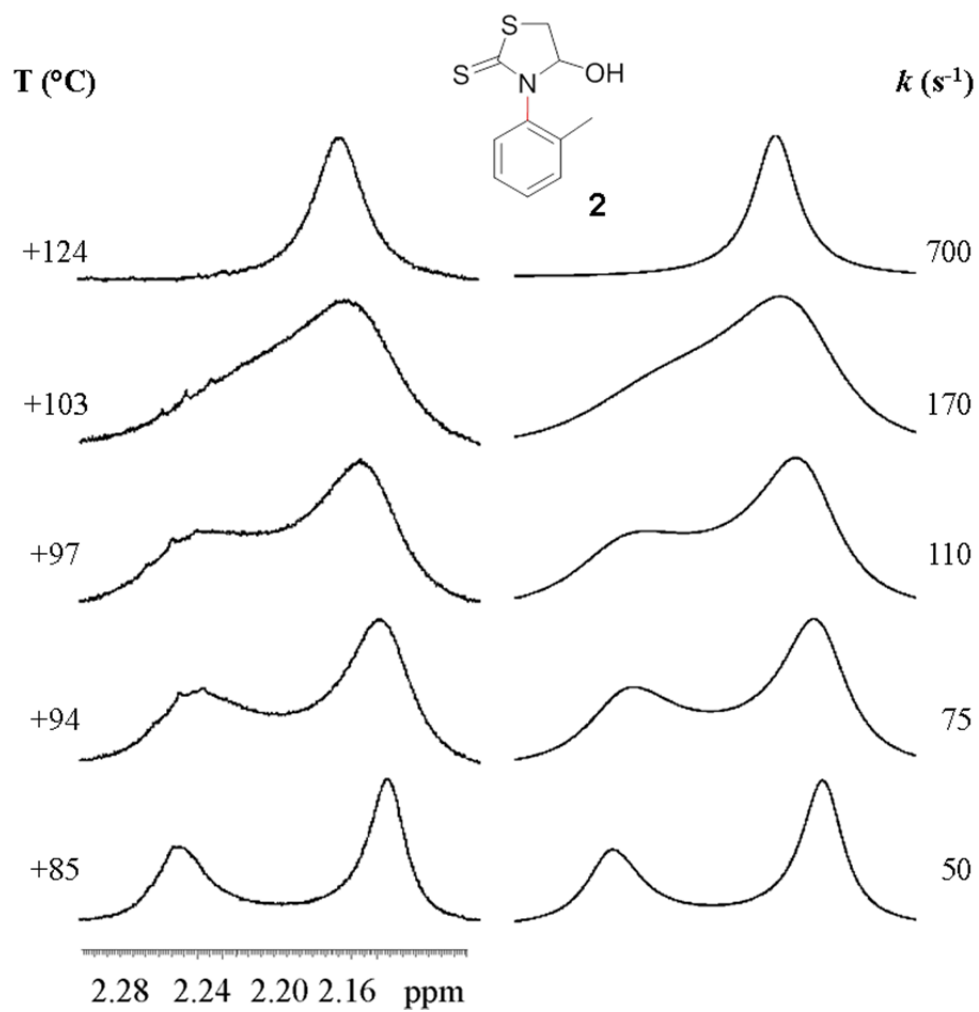

**Figure S1.** Left:  $^1\text{H}$  methyl signals at different temperatures of compound **2** ( $^1\text{H}$ -NMR 600 MHz in DMSO). Right: line shape simulation obtained with the rate constants reported (from the less stable to the more stable conformation).

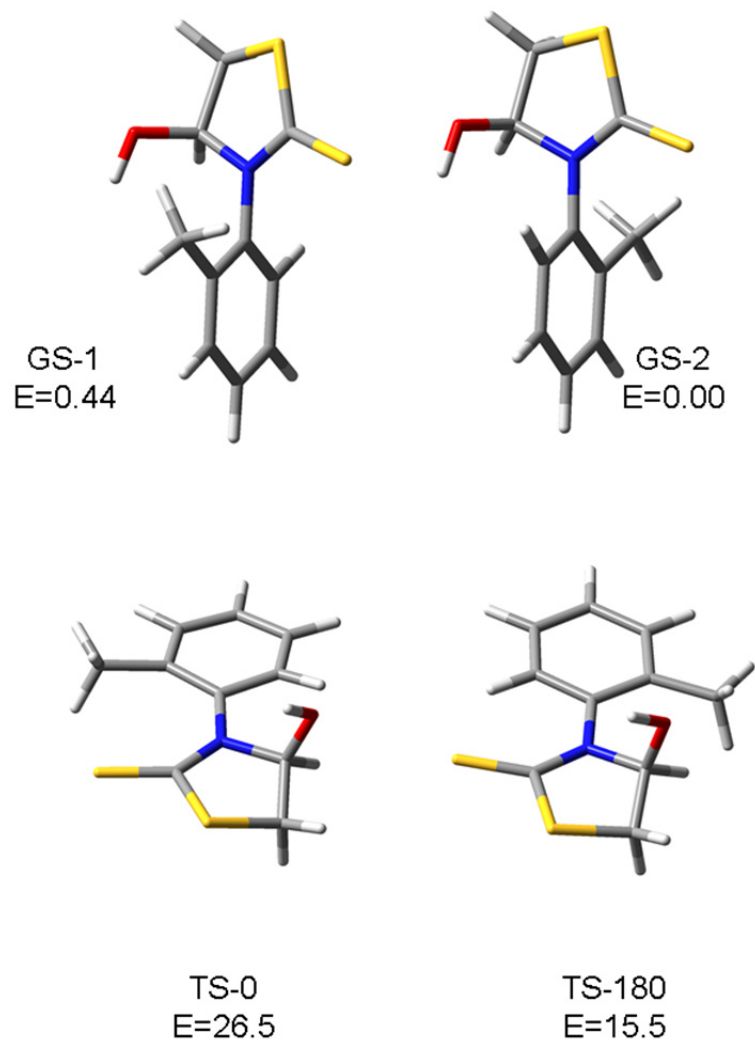

**Figure S2.** Calculated ground state and transition states for aryl rotation in compound **2**. Calculation at the B3LYP/6-31++G(d,p), energies in kcal/mol.

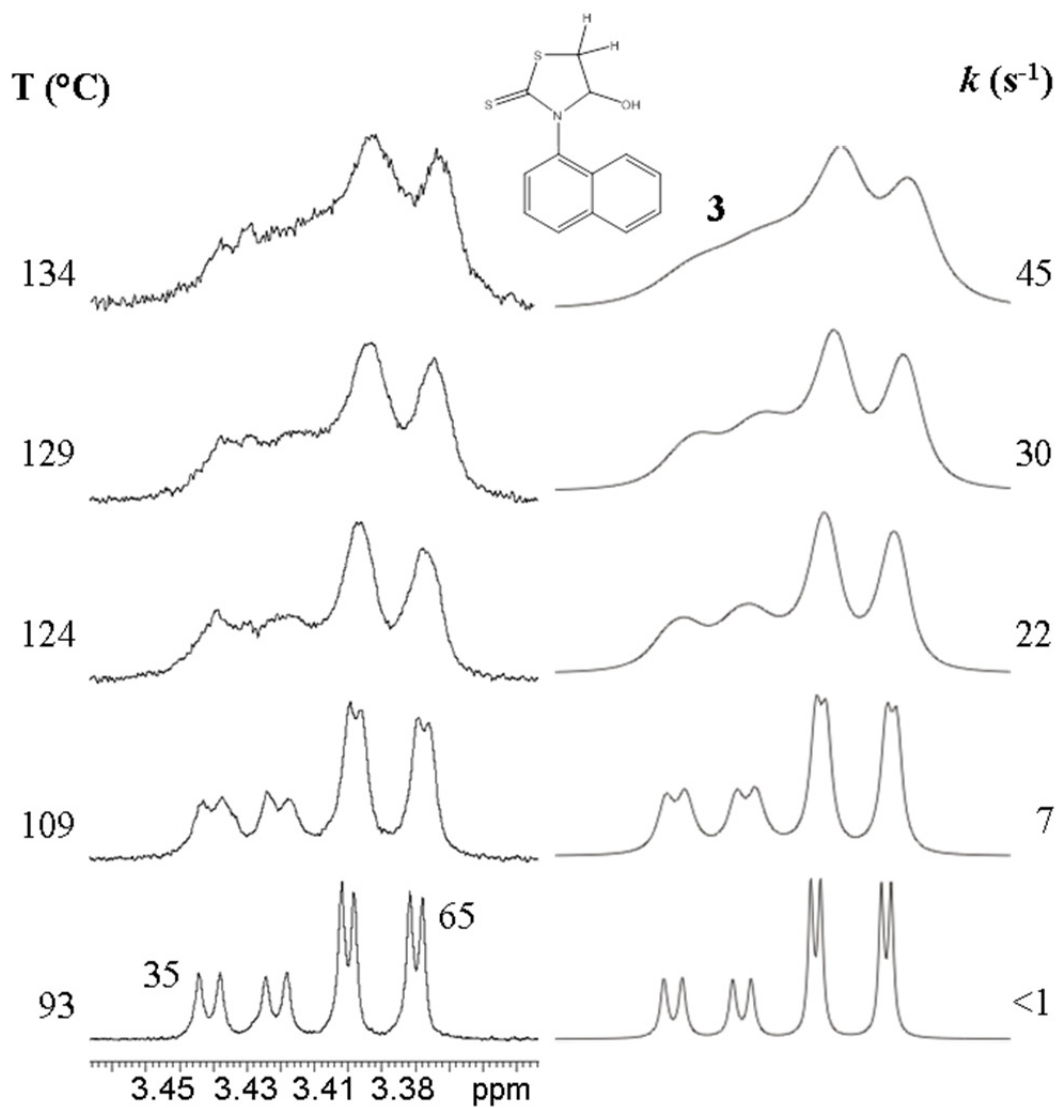

**Figure S3.** VT-NMR of compound **3**. On the left the experimental spectra ( $^1\text{H}$  NMR 600 MHz in DMSO- $d_6$ ). On the right the lineshape simulations with the relative rate constants (from the less stable to the more stable conformation).

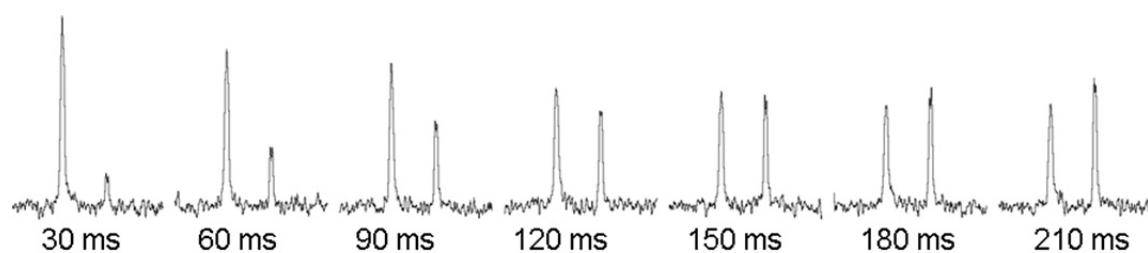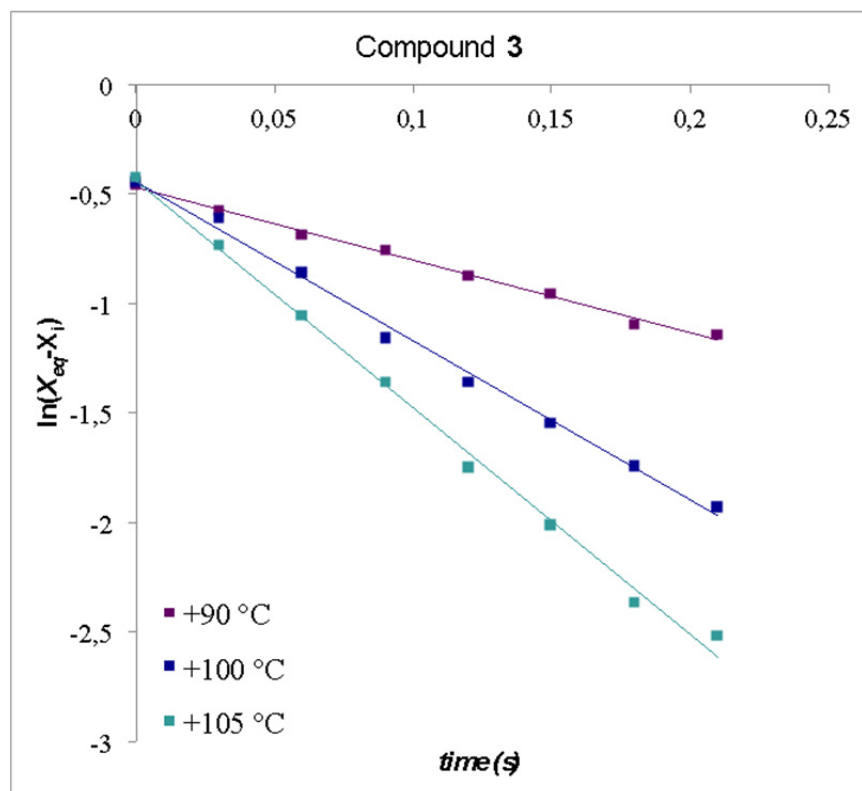

**Figure S4.** Kinetic study by 1D-EXSY of compound **3** at different temperatures. NMR spectra at top are relative to +100 °C. The signal is that of the stereogenic CH.

**Table S1.** Free energy of interconversion  $\Delta G^\ddagger$  of compound **3** obtained at each temperature.

| <i>Temperature (°C)</i> | <i>k<sub>1</sub> (s<sup>-1</sup>)</i> | <i>ΔG<sup>‡</sup> (kcal/mol)</i> |
|-------------------------|---------------------------------------|----------------------------------|
| +90                     | 1.91                                  | 21.0                             |
| +100                    | 4.05                                  | 21.1                             |
| +105                    | 5.42                                  | 21.2                             |

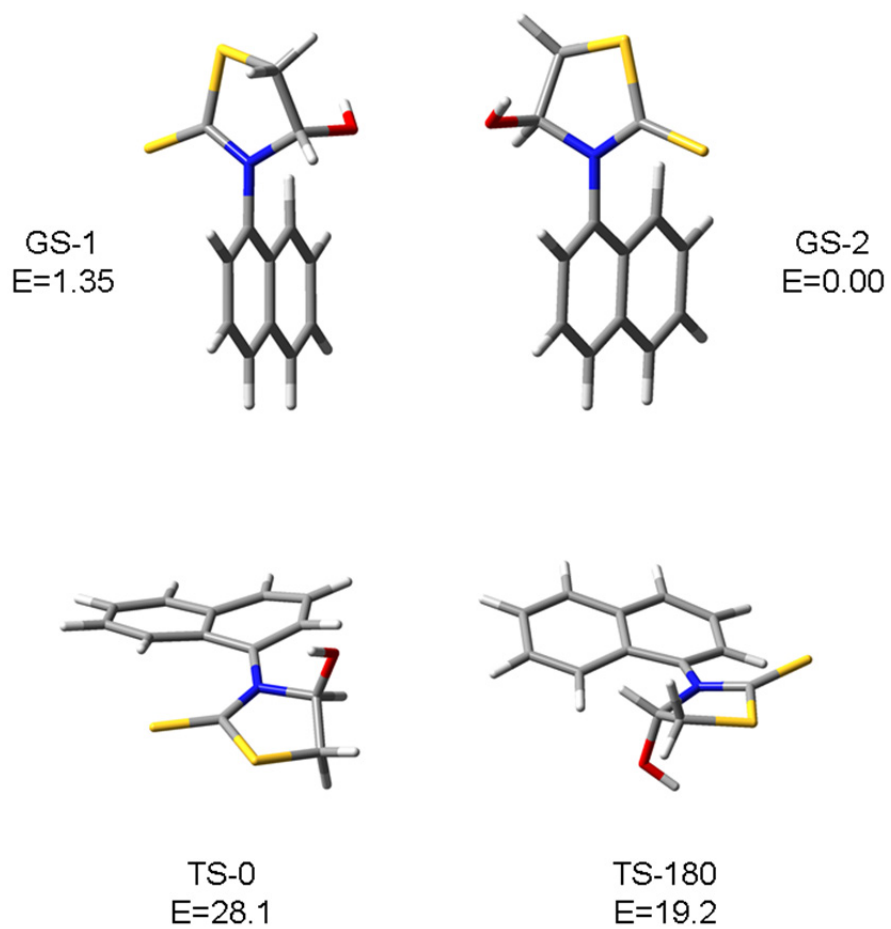

**Figure S5.** Calculated ground state and transition states for aryl rotation in compound **3**. Calculation at the B3LYP/6-31++G(d,p), energies in kcal/mol.

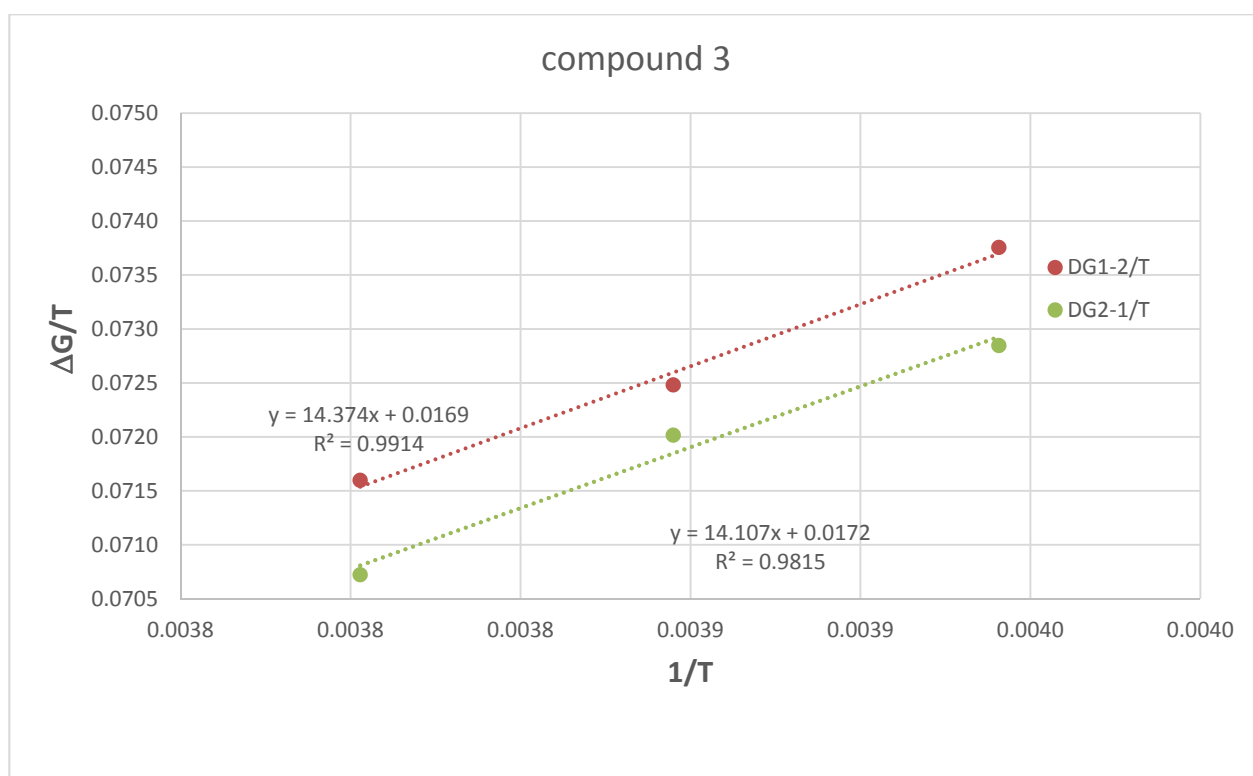

**Figure S6.** Van't Hoff analysis of the free activation energy in function of temperature in compound **3**.

**Table S2.** Calculated Values of  $\Delta G^\ddagger$  (kcal/mol) for diastereomerization process in compound **3**.

| <i>T</i> (K) | <i>1/T</i> | $\Delta G_{1-2}$ | $\Delta G_{2-1}$ | <i>T</i> (°C) |
|--------------|------------|------------------|------------------|---------------|
| 263          | 0,0038     | 18,83            | 18,60            | -10           |
| 258          | 0,0039     | 18,70            | 18,58            | -15           |
| 253          | 0,0040     | 18,66            | 18,43            | -20           |

$$\frac{\Delta G}{T} = \frac{\Delta H}{T} - \Delta S$$

$$\Delta S_{2-1} = -0.0172 = -17 \text{ u.e.}$$

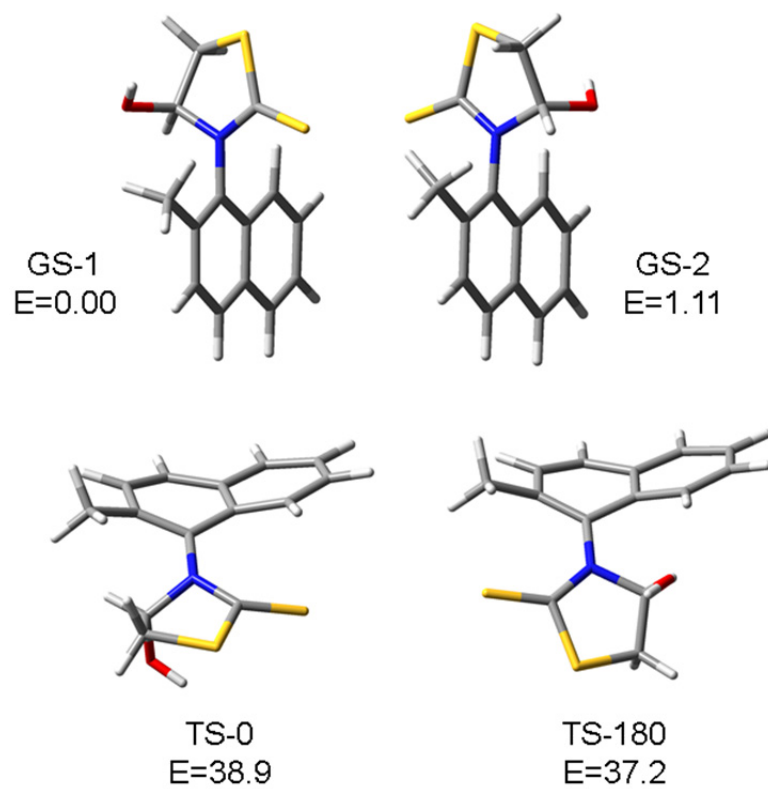

**Figure S7.** Calculated ground state and transition states for aryl rotation in compound **4**. Calculation at the B3LYP/6-31++G(d,p), energies in kcal/mol.



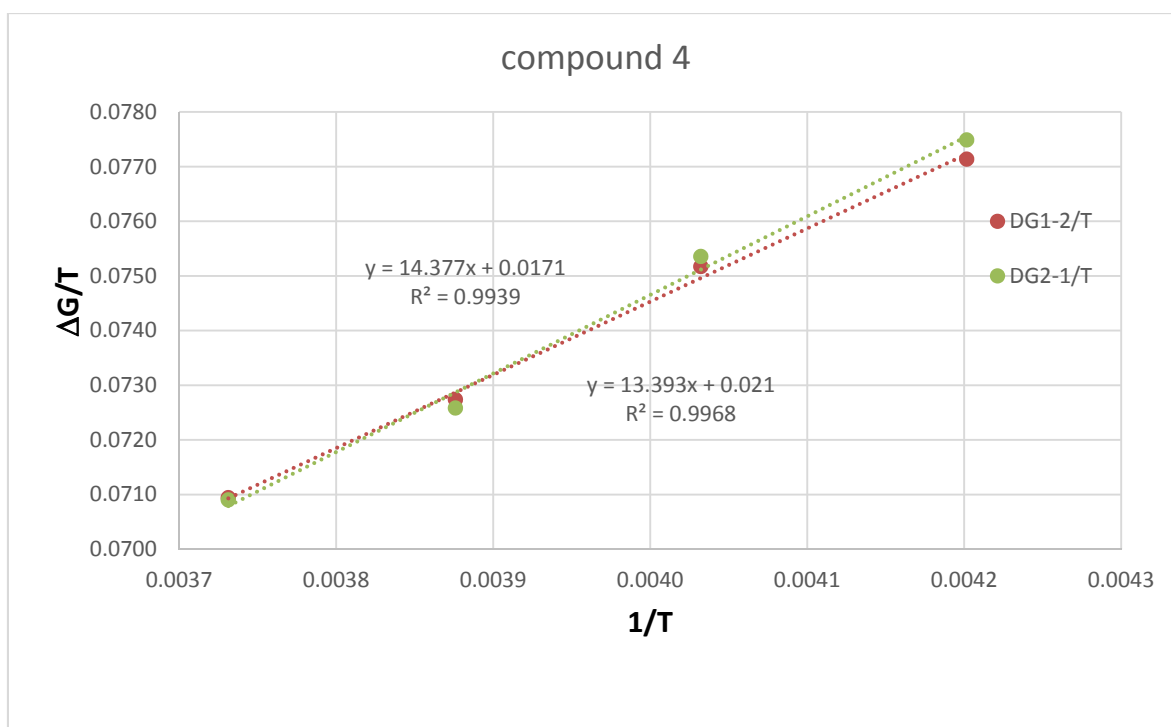

**Figure S8.** Van't Hoff analysis of free activation energy in function of temperature in compound **4**.

**Table S3:** Calculated Values of  $\Delta G^\ddagger$  (kcal/mol) for diastereomerization process in compound **4**.

| <i>T</i> (K) | <i>1/T</i> | $\Delta G_{1-2}$ | $\Delta G_{2-1}$ | <i>T</i> (°C) |
|--------------|------------|------------------|------------------|---------------|
| 288          | 0,0035     | 21,503           | 21,575           | + 15          |
| 302          | 0,0033     | 21,516           | 21,579           | + 29          |
| 308          | 0,0032     | 21,529           | 21,599           | + 35          |
| 313          | 0,0032     | 21,670           | 21,739           | + 40          |

$$\frac{\Delta G}{T} = \frac{\Delta H}{T} - \Delta S$$

$$\Delta S_{2-1} = -0.017 = -17 \text{ u.e.}$$

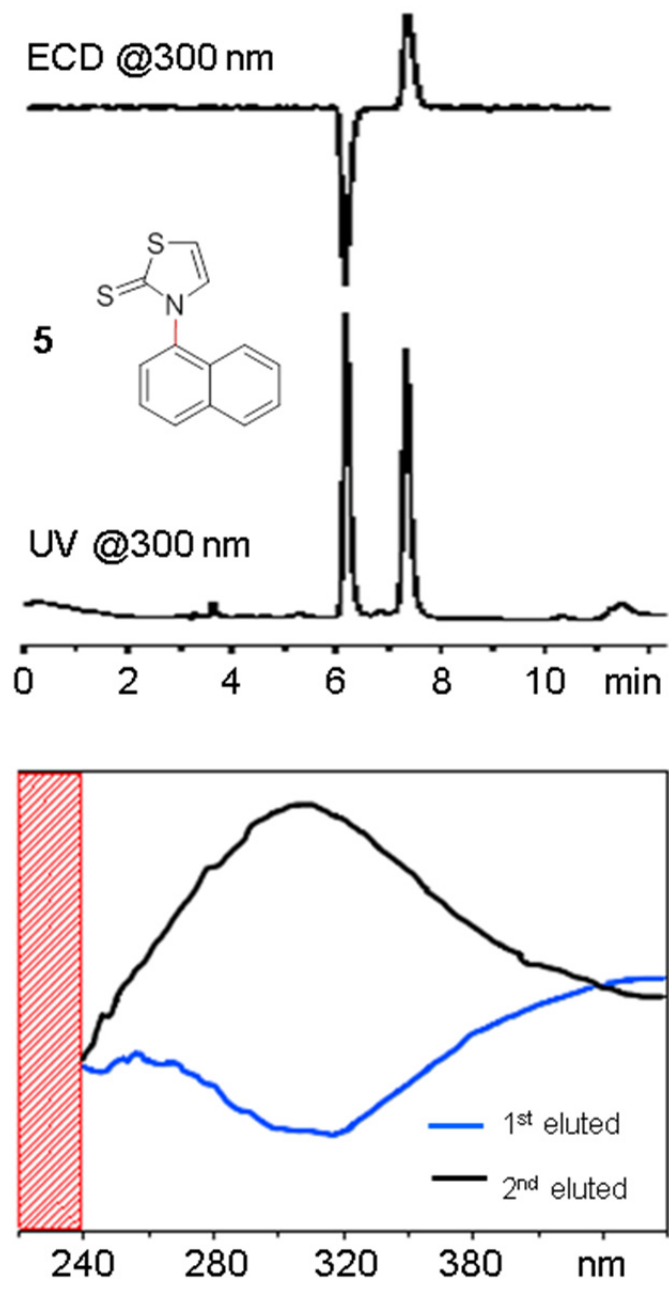

**Figure S9.** Top: CD and UV chromatograms of compound **5** recorded at +2 °C. Analytical condition: (*R,R*)-Whelk-O1 column, 250 x 4.6 mm I.D. 5  $\mu$ m; eluent: hexane/dichloromethane, 70:30 +2% MeOH ; flow rate: 1 mL/min; UV and CD @ 300 nm. Bottom: Stopped-flow On-line ECD spectra of the two conformational enantiomers.

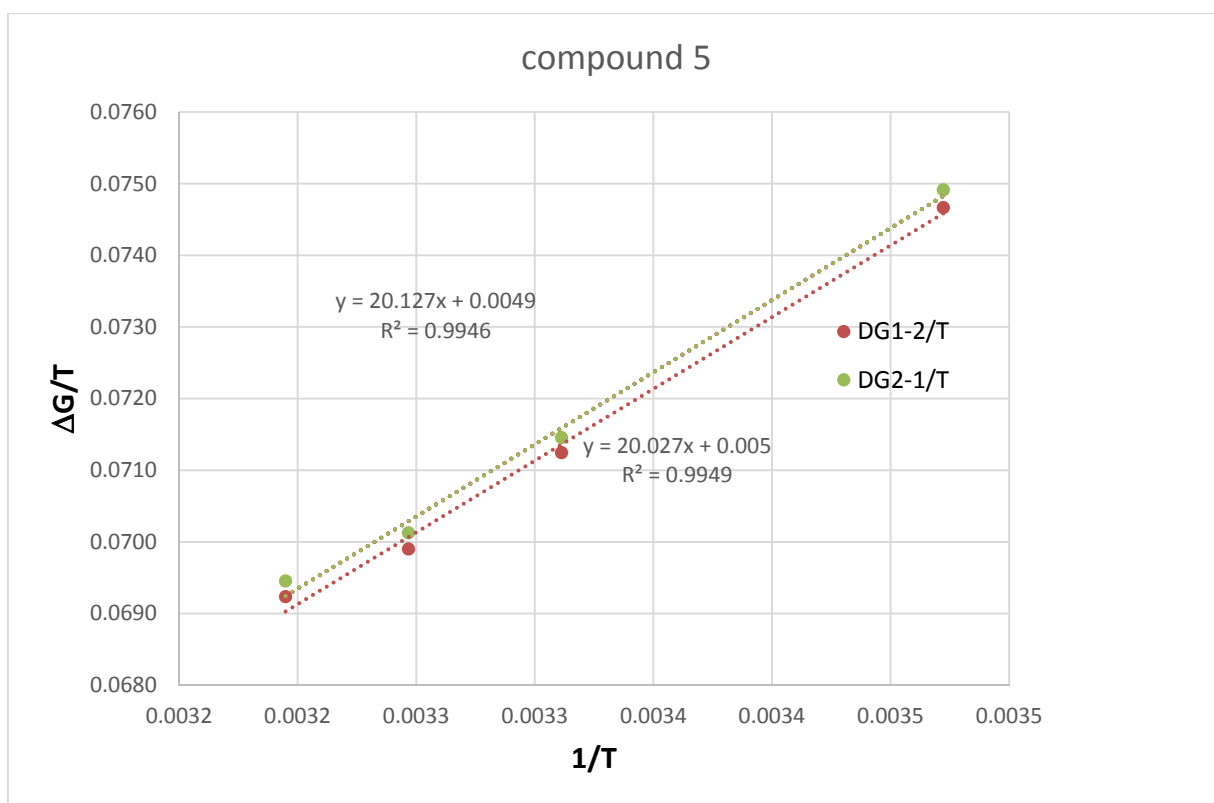

**Figure S10.** Van't Hoff analysis of free activation energy in function of temperature in compound 5.

**Table S4:** Calculated Values of  $\Delta G^\ddagger$  (kcal/mol) for diastereomerization process in compound 5.

| $T$ (K) | $1/T$  | $\Delta G_{1-2}$ | $\Delta G_{2-1}$ | $T$ ( $^{\circ}\text{C}$ ) |
|---------|--------|------------------|------------------|----------------------------|
| 288     | 0,0035 | 21,503           | 21,575           | +15                        |
| 302     | 0,0033 | 21,516           | 21,579           | +29                        |
| 308     | 0,0032 | 21,529           | 21,599           | +35                        |
| 313     | 0,0032 | 21,670           | 21,739           | +40                        |

$$\frac{\Delta G}{T} = \frac{\Delta H}{T} - \Delta S$$

$$\Delta S = -0.0049 = -5 \text{ u.e.}$$

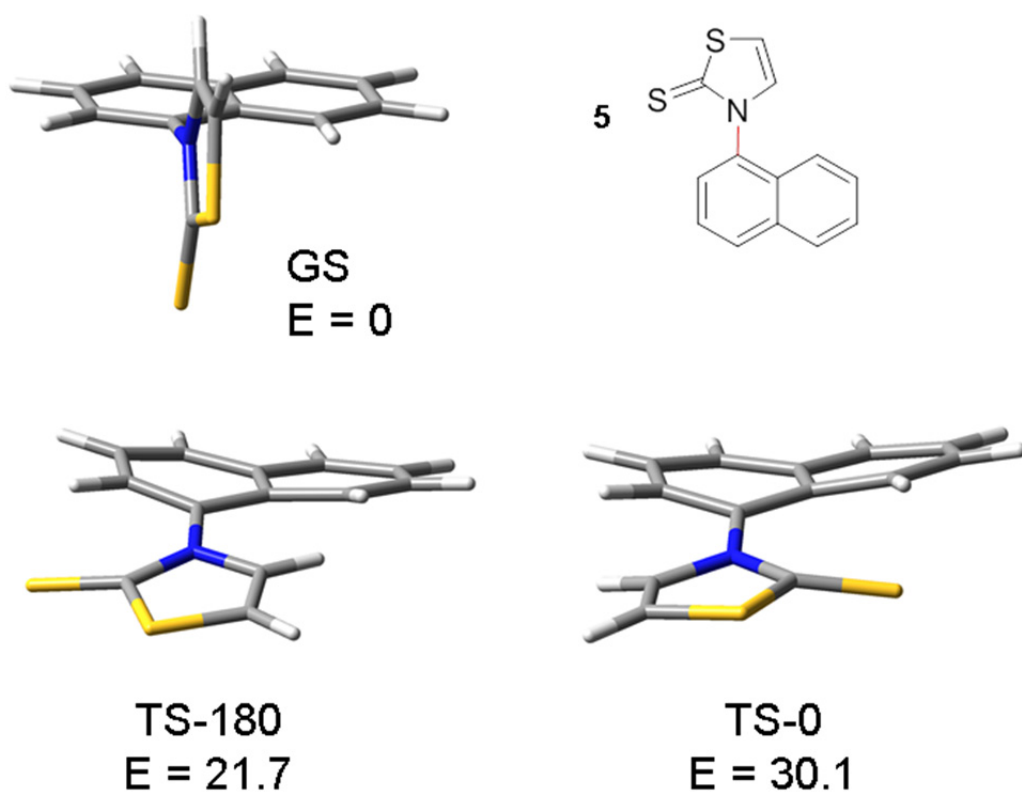

**Figure S11.** Calculated ground state and transition states for aryl rotation in compound **5**. Calculation at the B3LYP/6-31++G(d,p), energies in kcal/mol.

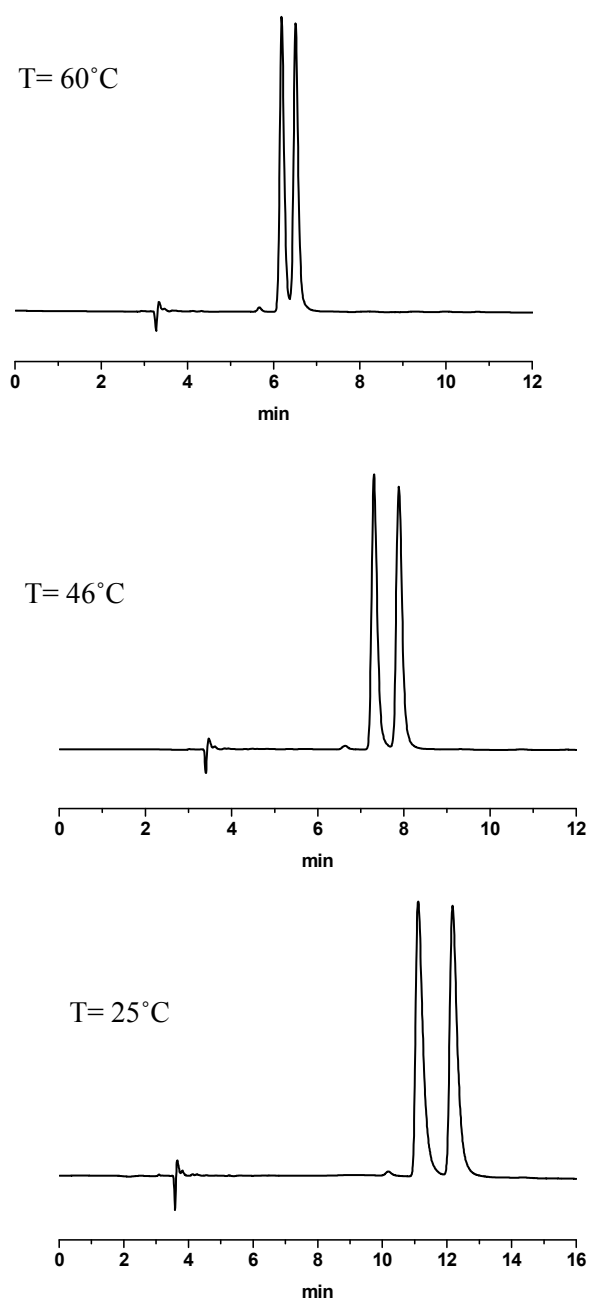

**Figure S12.** Experimental chromatographic profiles of the compound **6**, at different temperatures. Analytical conditions: Column: Chiralpak IB 250 x 4.6 mm *I.D.* 5  $\mu\text{m}$ ; Mobile phase hexane/IPA, 80:20; Flow: 1 mL/min; Detector: UV@ 254 nm.

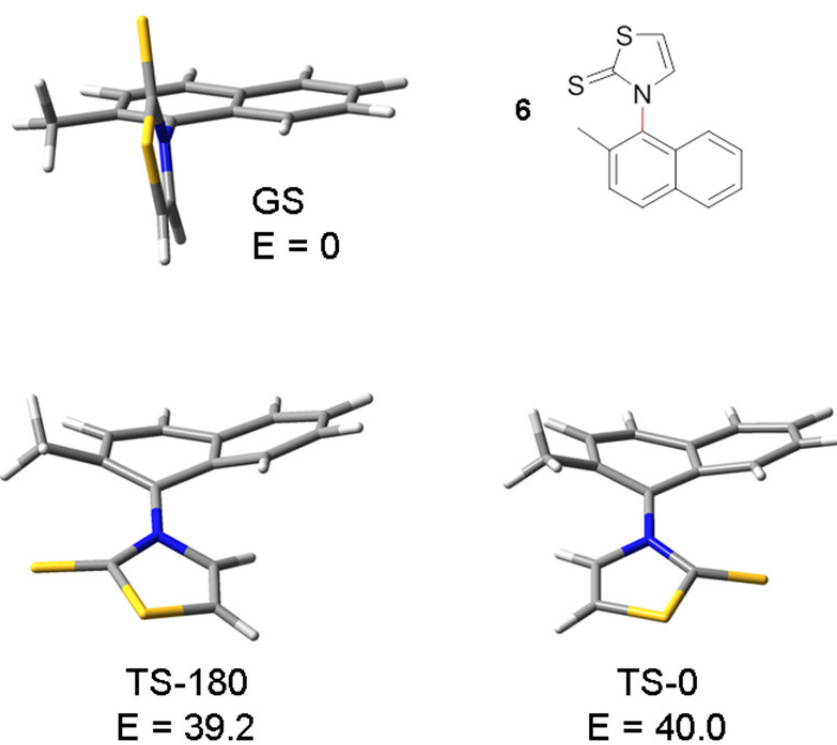

**Figure S13.** Calculated ground state and transition states for aryl rotation in compound **6**. Calculation at the B3LYP/6-31++G(d,p), energies in kcal/mol.

ACQUISITION PARAMETERS

Pulse Sequence: s2pul  
Solvent: cd3cn  
Temp. 25.0 C / 298.1 K  
Acq. time 2.995 sec  
Width 9611.9 Hz  
OBSERVE H1, 599.7307582 MHz  
DATA PROCESSING  
F1 size 65536

# Compound 1

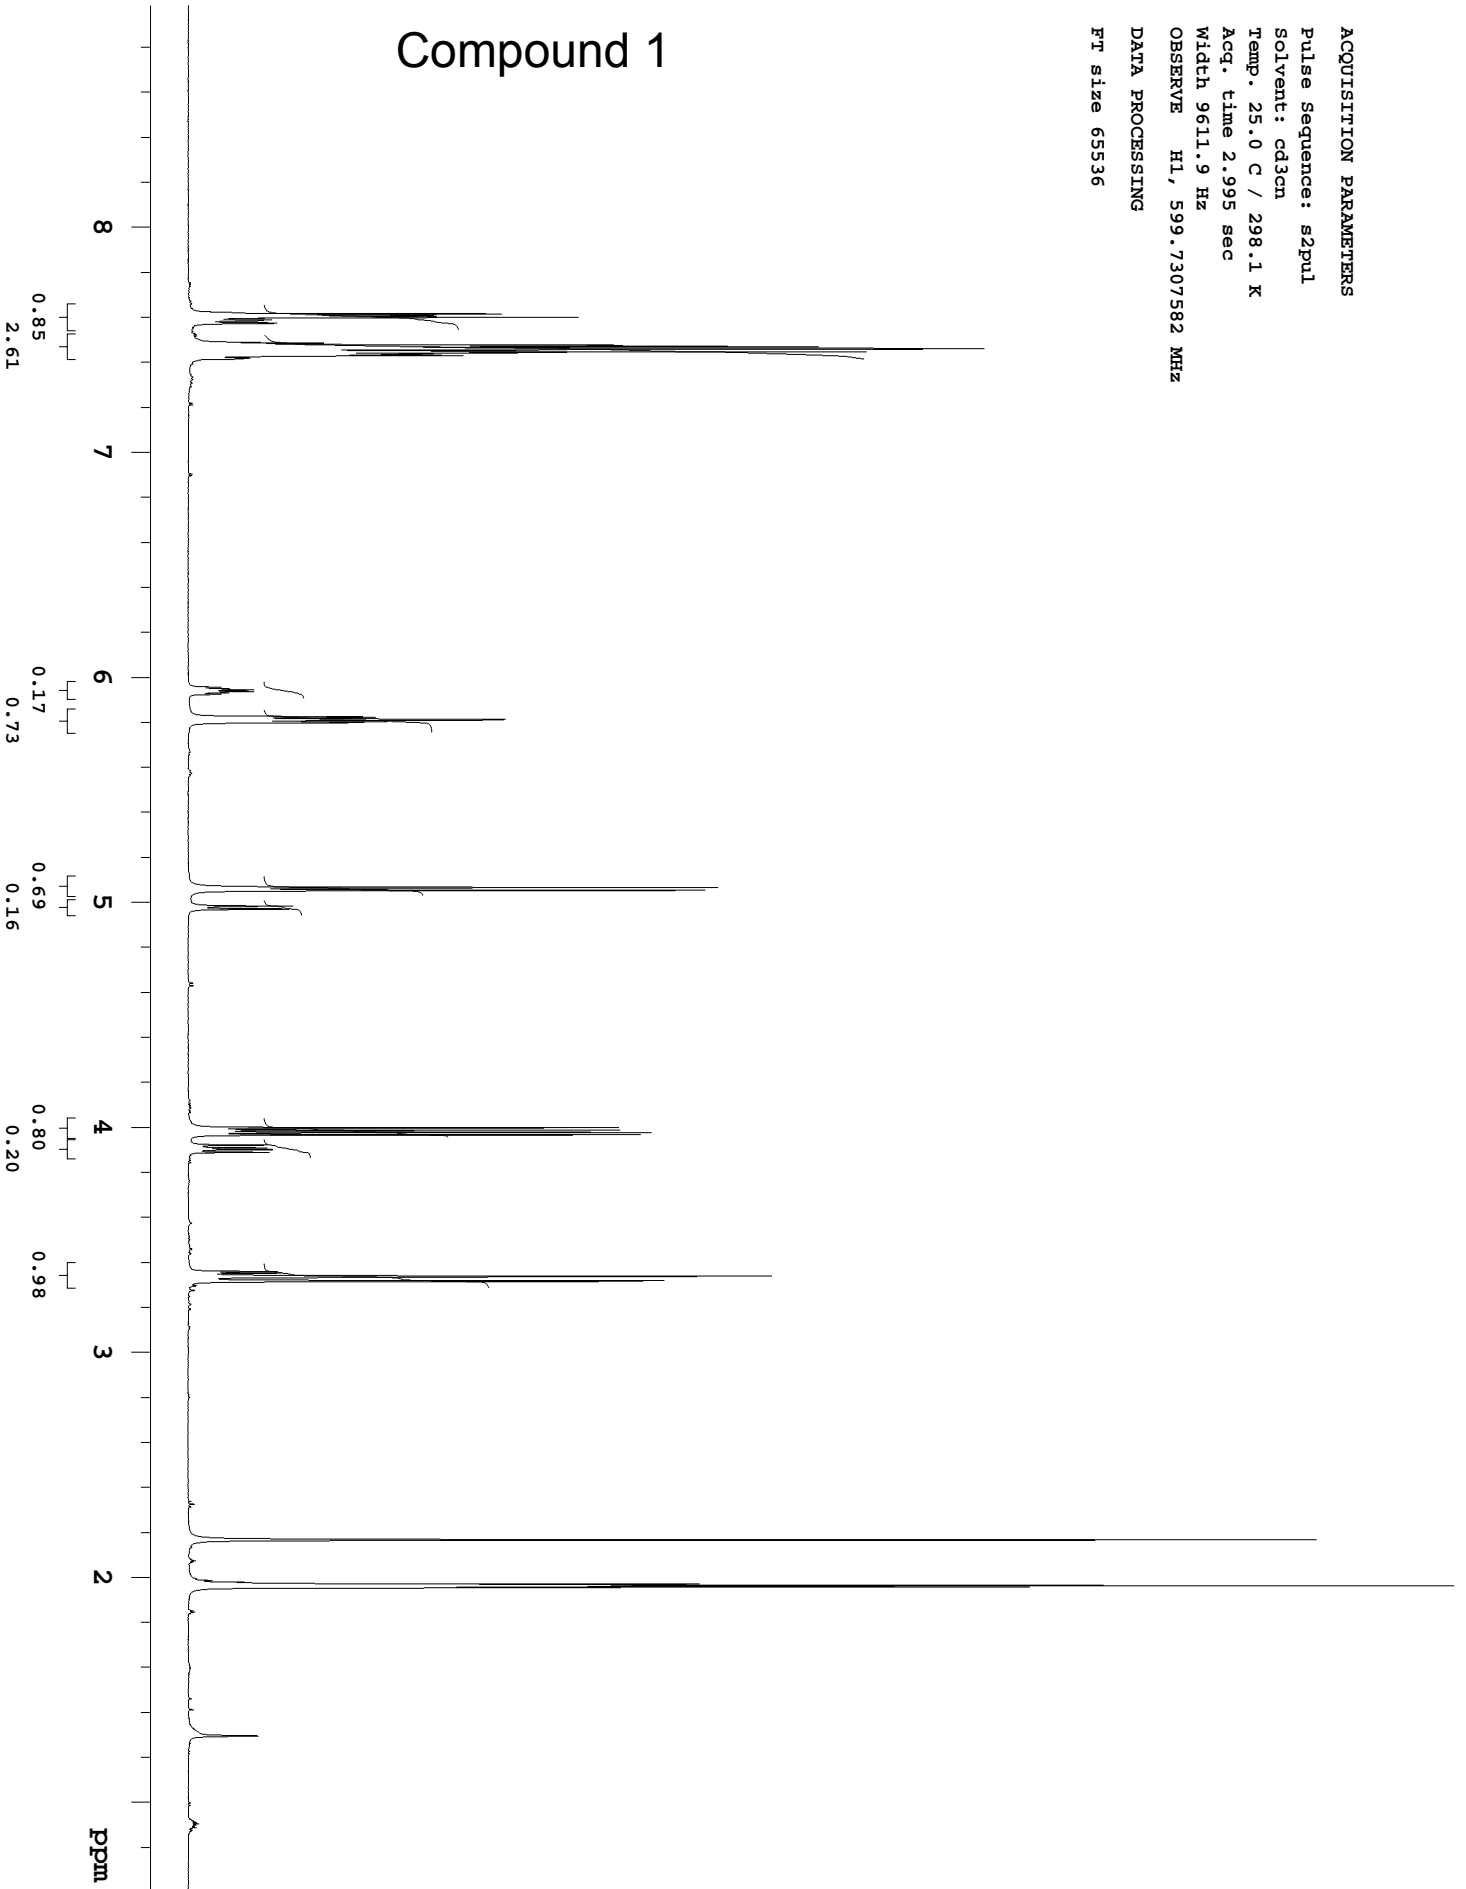

# Compound 1

180 160 140 120 100 80 60 40 ppm

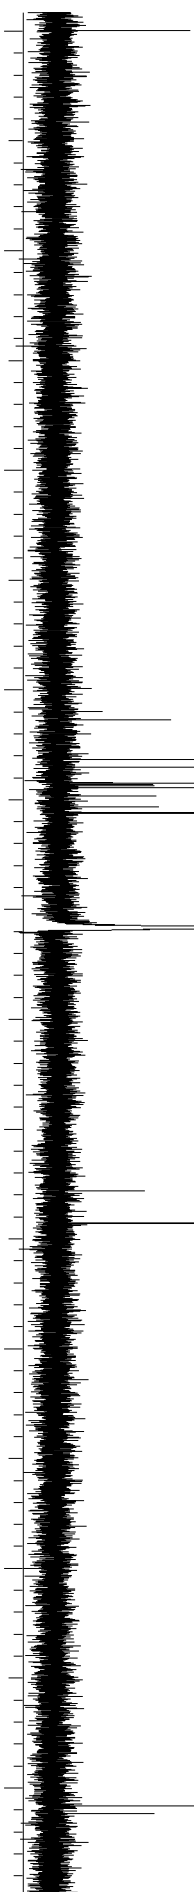

| INDEX | FREQUENCY | PPM     | HEIGHT |
|-------|-----------|---------|--------|
| 1     | 30165.6   | 200.034 | 17.1   |
| 2     | 20695.9   | 137.239 | 14.6   |
| 3     | 20153.8   | 133.644 | 79.0   |
| 4     | 20043.9   | 132.915 | 19.9   |
| 5     | 19830.2   | 131.498 | 72.0   |
| 6     | 19806.0   | 131.337 | 12.2   |
| 7     | 19793.8   | 131.257 | 12.4   |
| 8     | 19762.9   | 131.052 | 71.4   |
| 9     | 19654.7   | 130.334 | 12.6   |
| 10    | 19497.9   | 129.294 | 13.0   |
| 11    | 19417.8   | 128.763 | 77.4   |
| 12    | 17839.9   | 118.300 | 941.5  |
| 13    | 14226.4   | 94.338  | 11.1   |
| 14    | 13783.6   | 91.402  | 67.7   |
| 15    | 5779.2    | 38.323  | 73.8   |
| 16    | 5674.8    | 37.631  | 12.3   |



# Compound 1

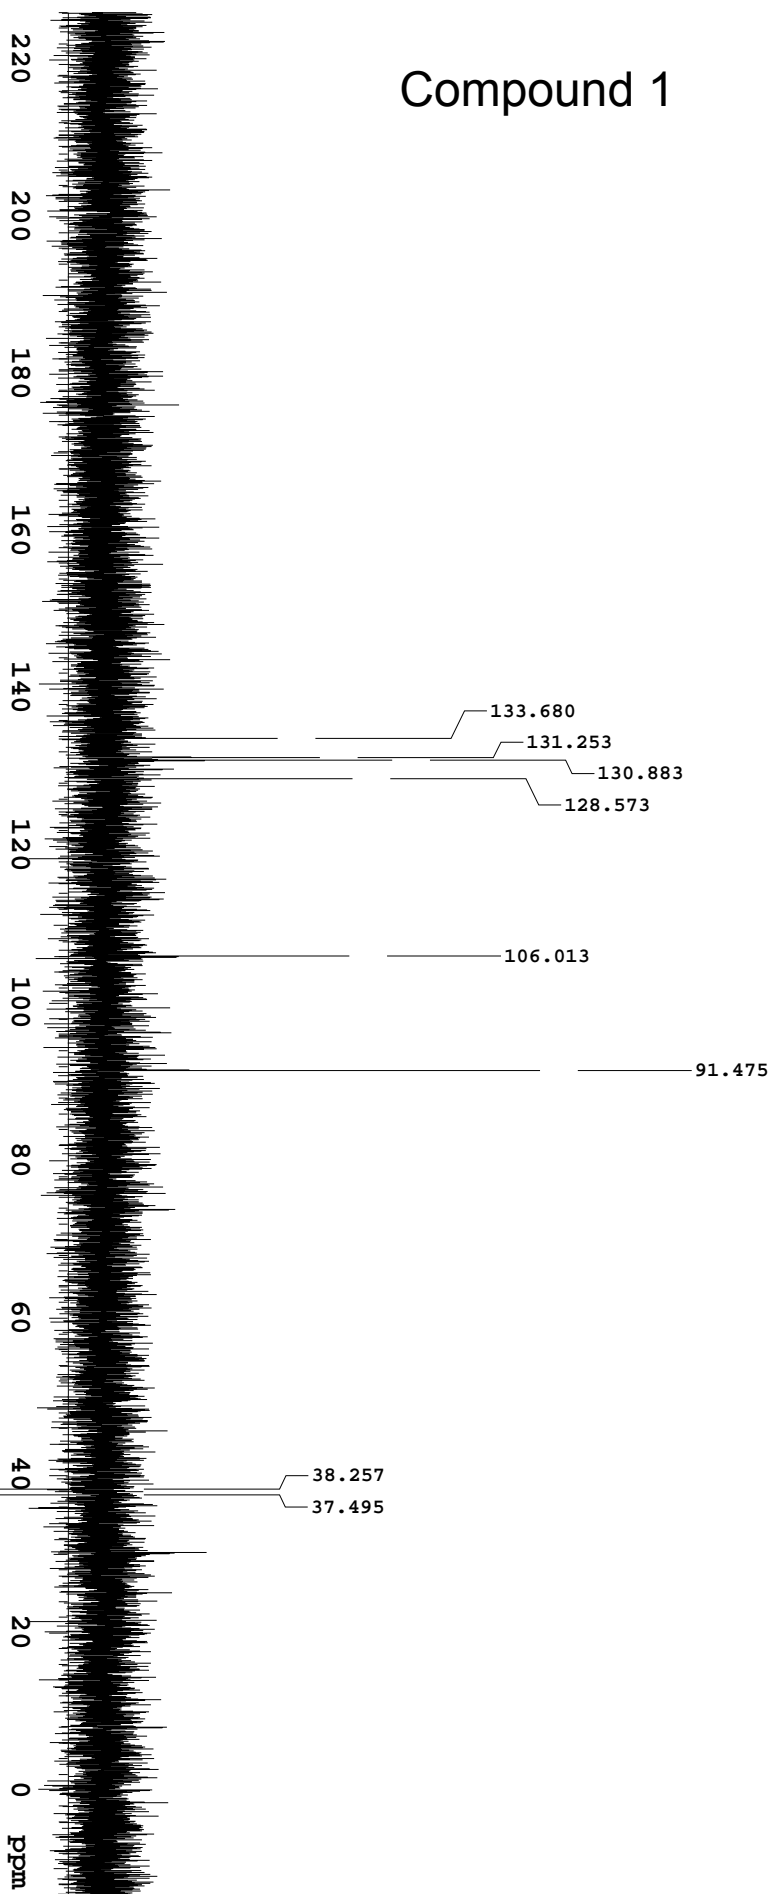

# Compound 2

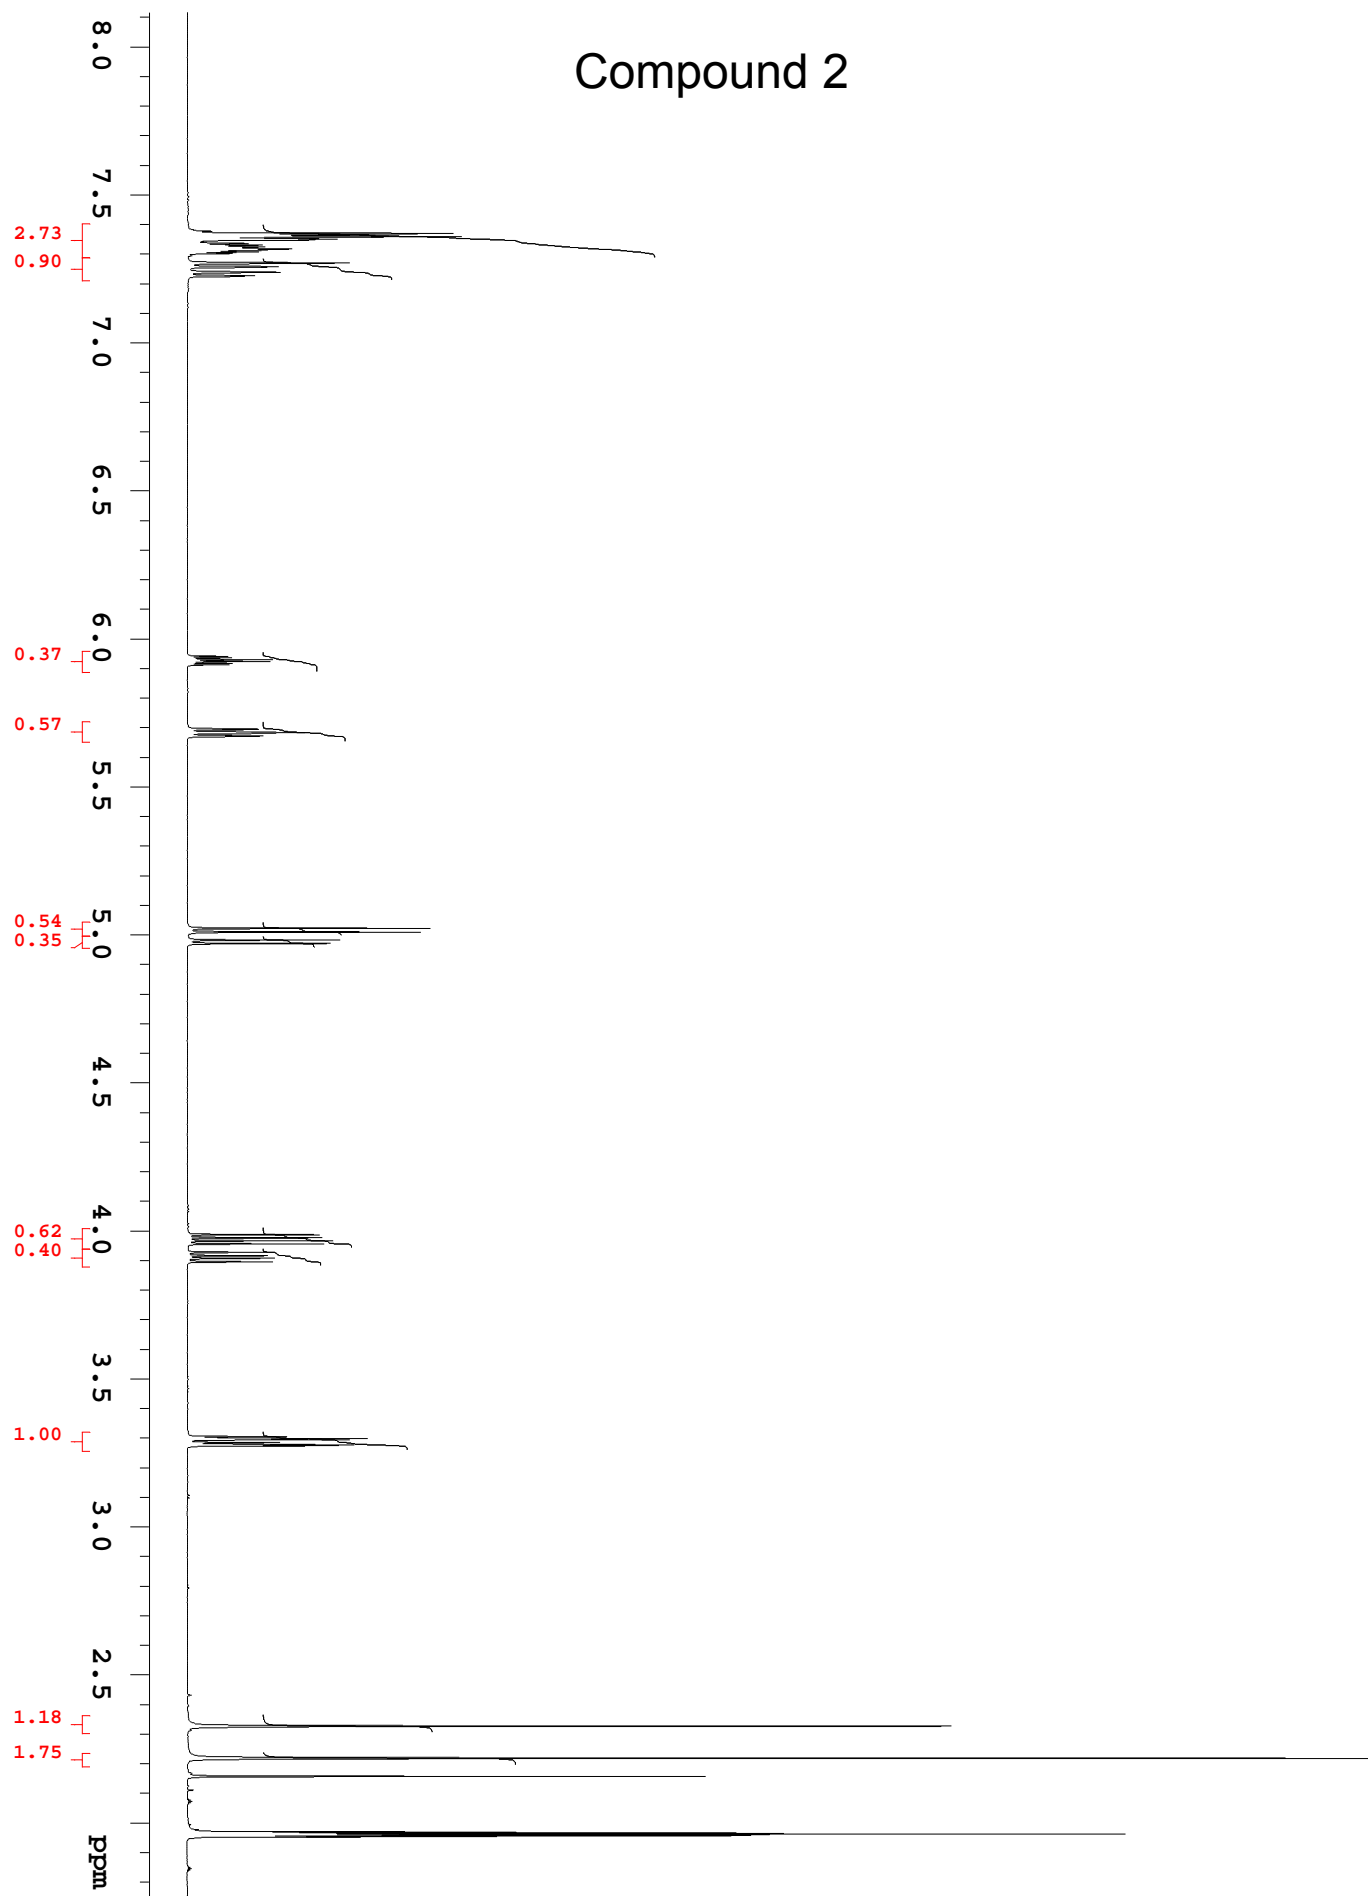

# Compound 2

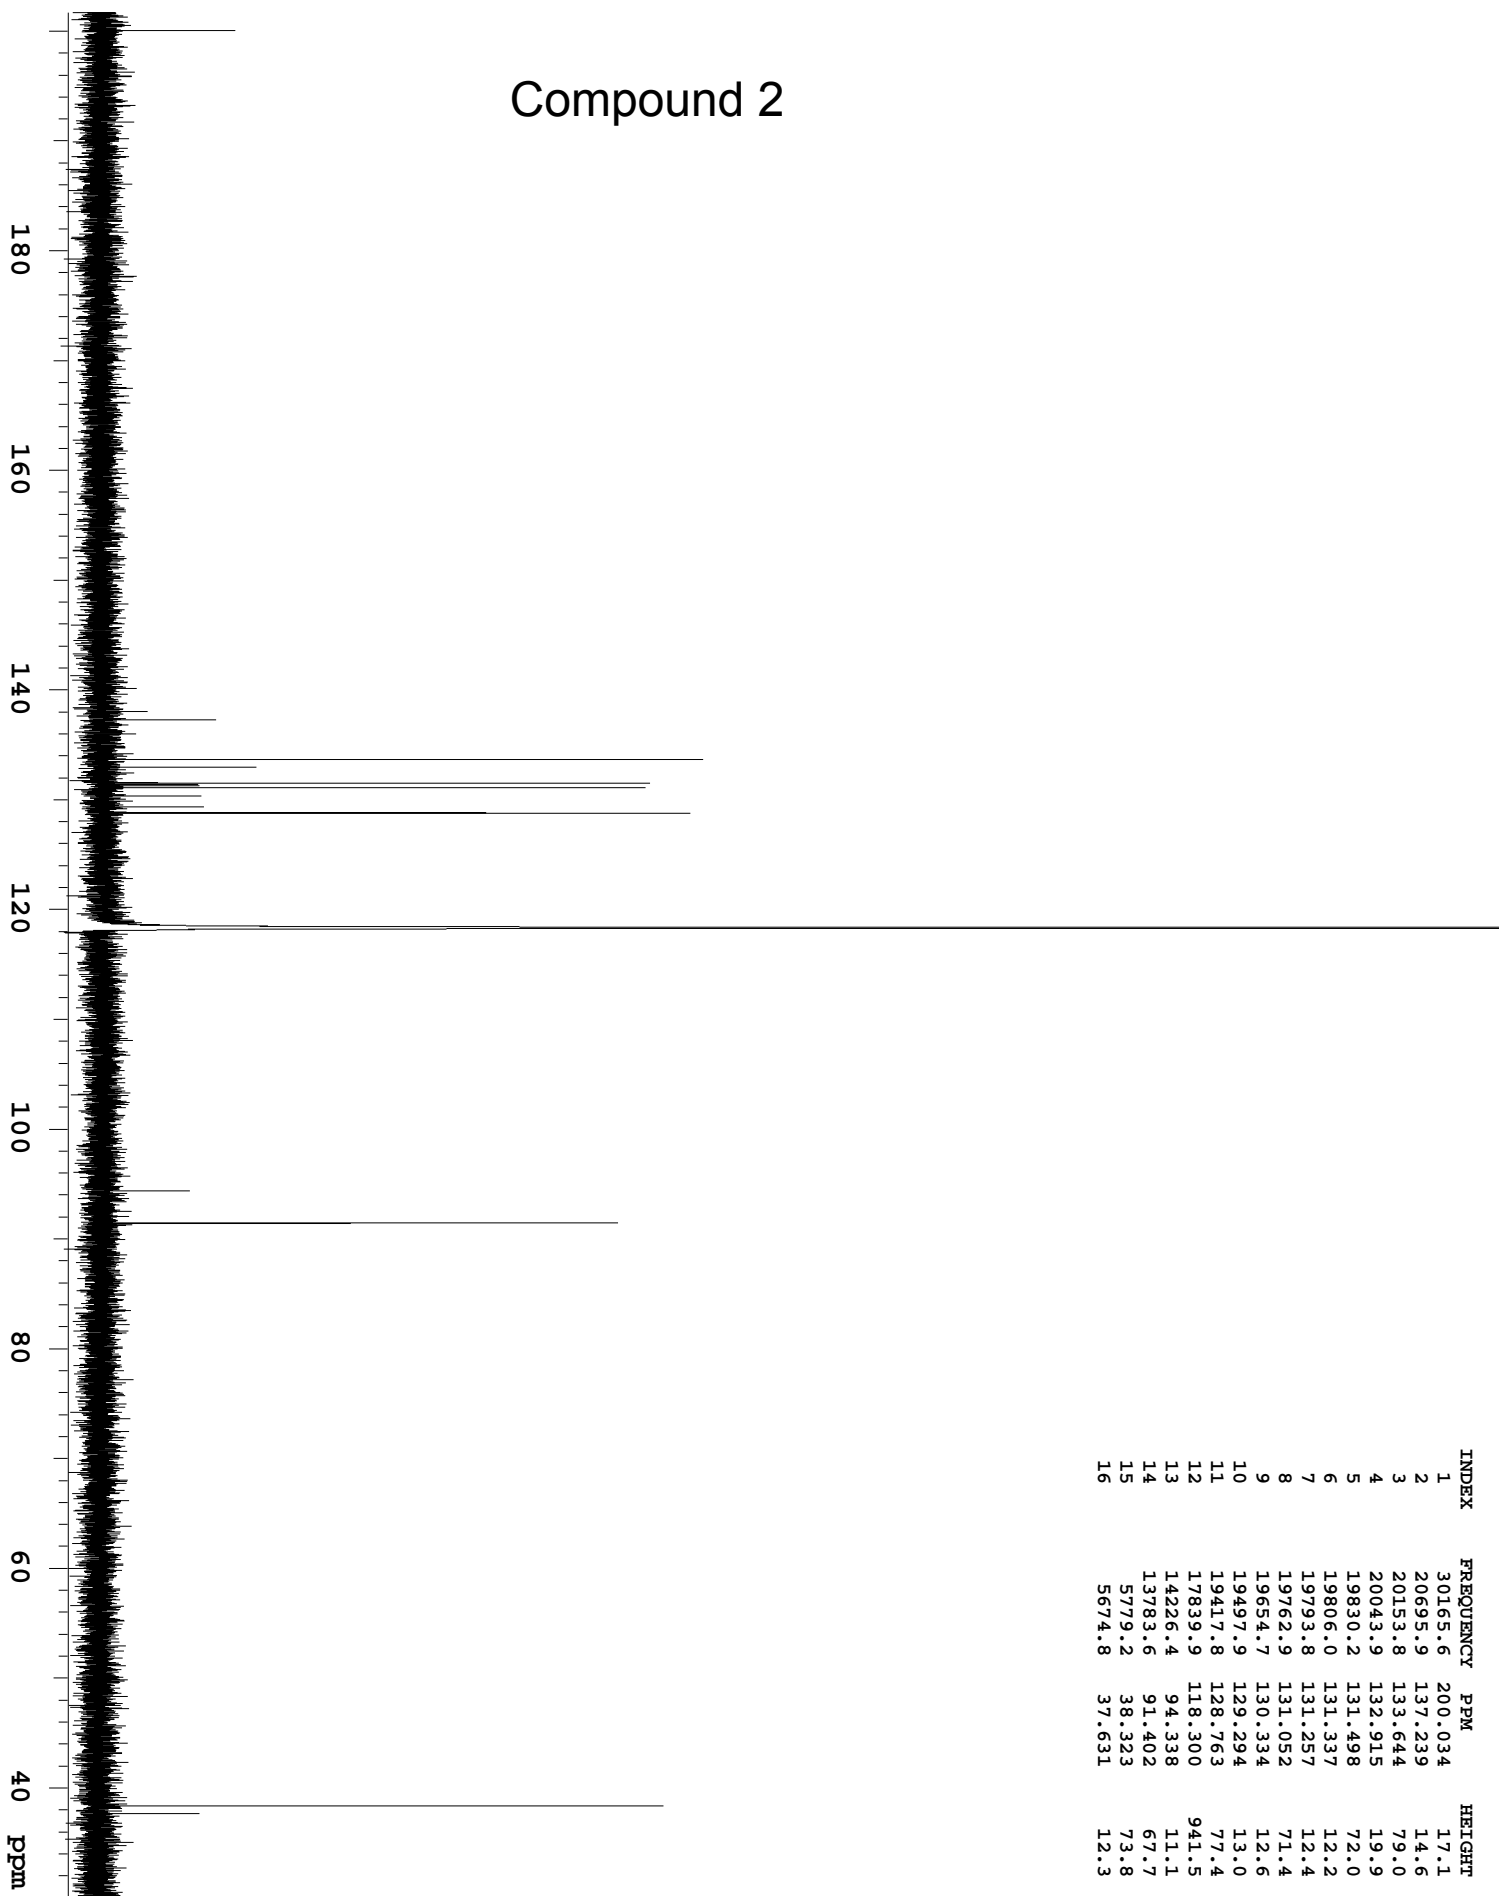

compound 2

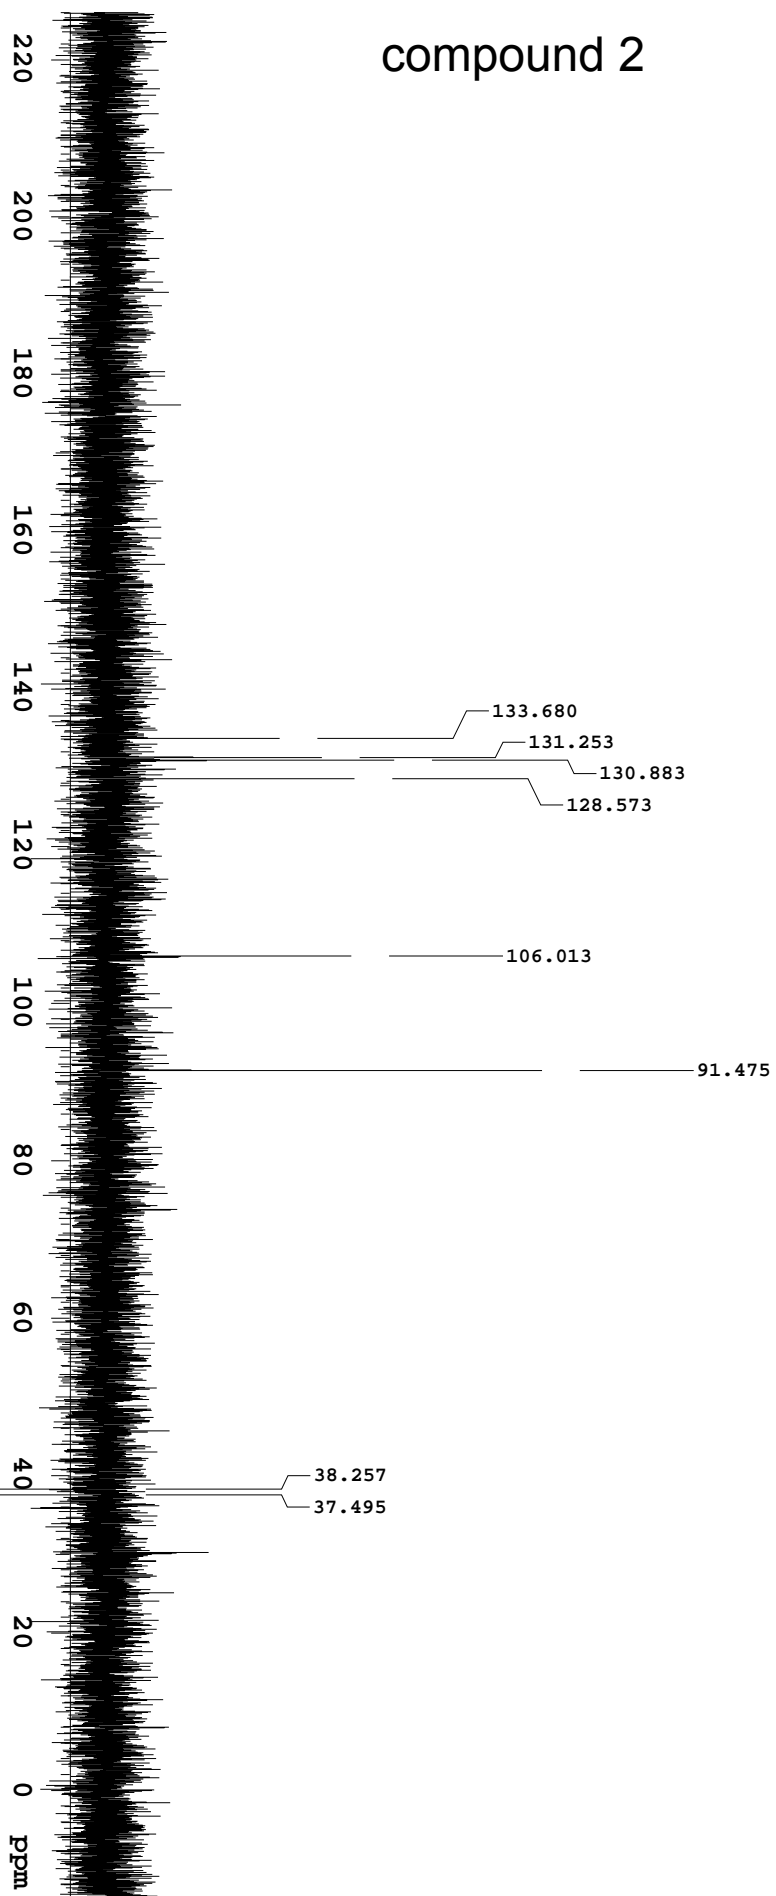

# Compound 3

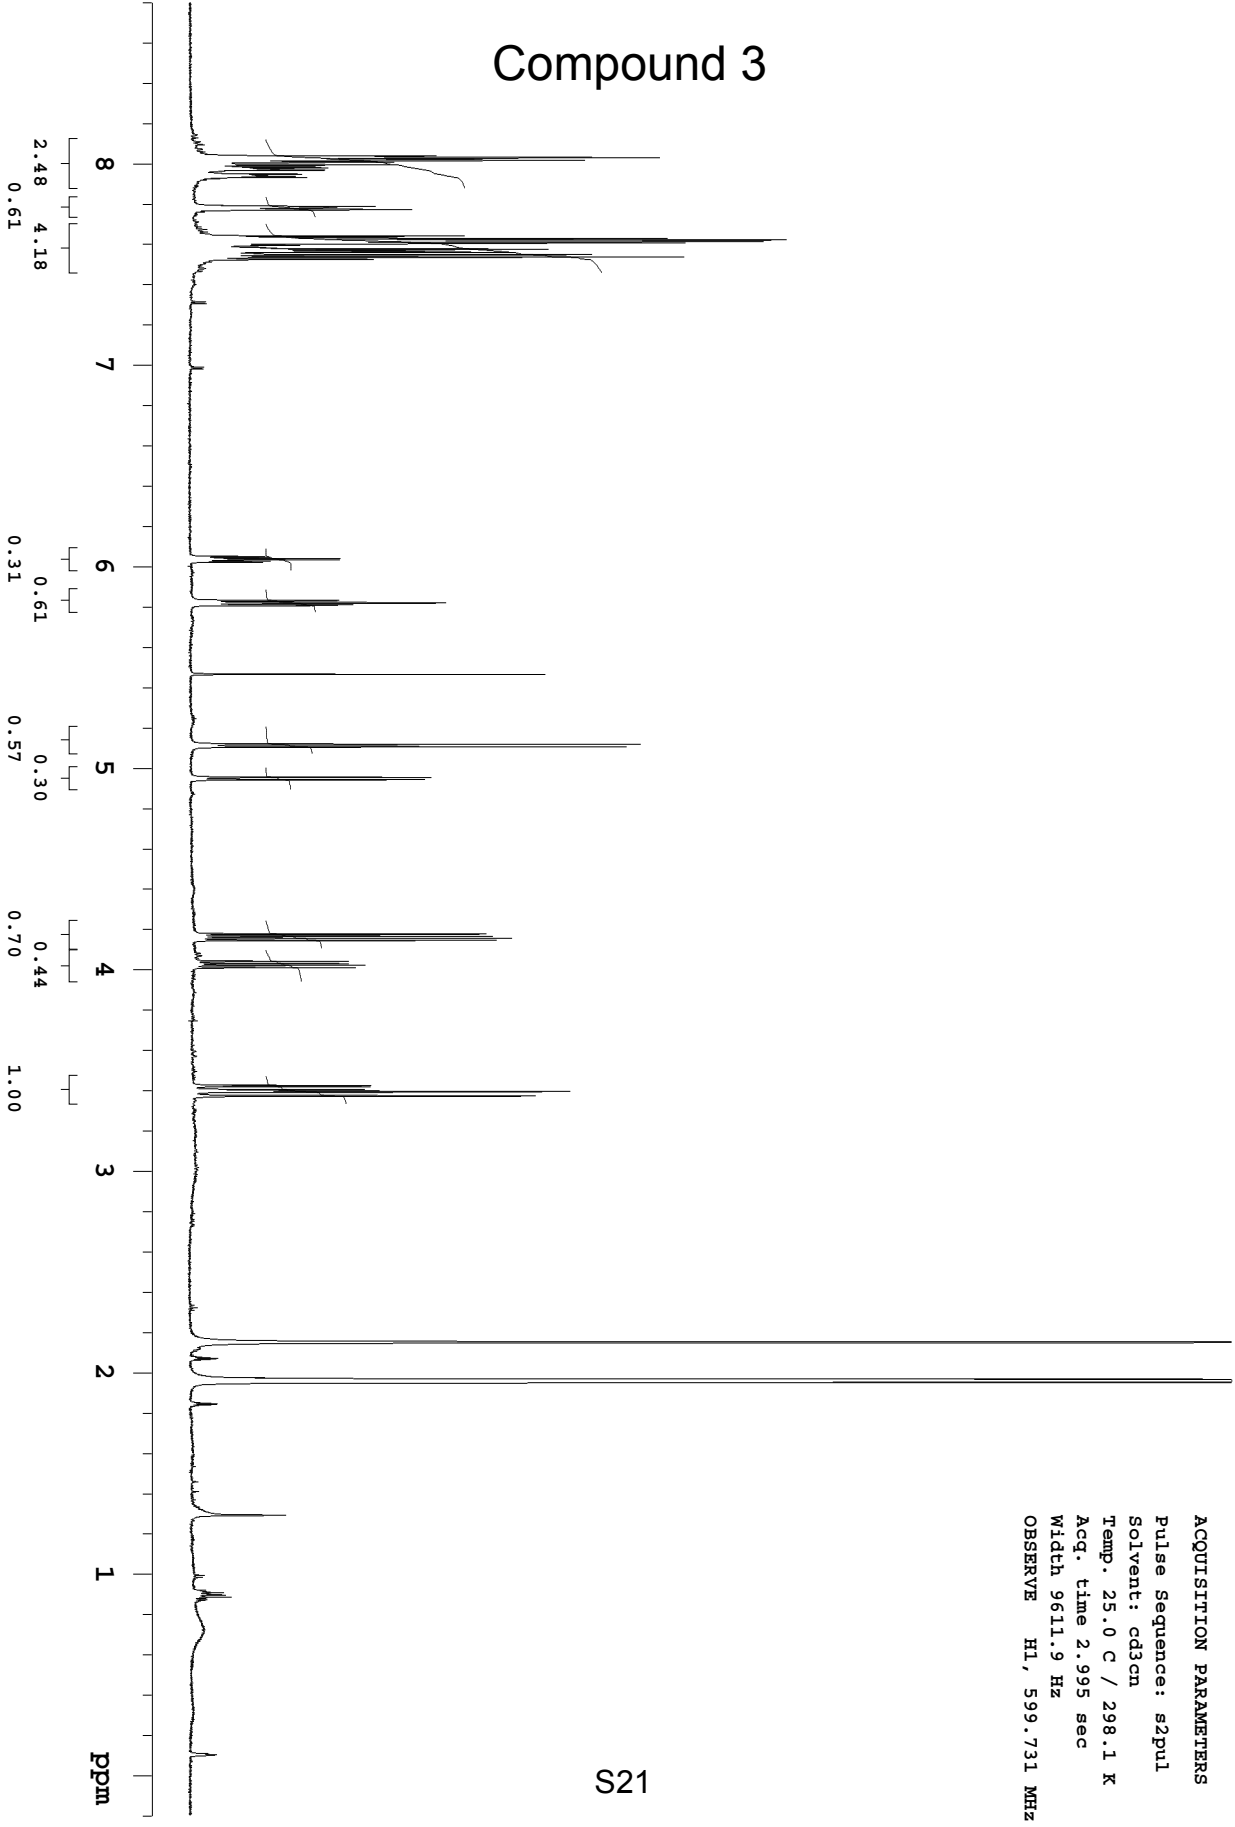

ACQUISITION PARAMETERS  
Pulse Sequence: s2pul  
Solvent: cd3cn  
Temp. 25.0 C / 298.1 K  
Acq. time 2.995 sec  
Width 9611.9 Hz  
OBSERVE H1, 599.731 MHz

ACQUISITION PARAMETERS

Pulse Sequence: s2pul  
Solvent: cd3cn  
Temp. 25.0 C / 298.1 K  
Acq. time 1.000 sec  
Width 36182.7 Hz  
OBSERVE C13, 150.802 MHz  
DECOUPLE H1, 599.734 MHz  
Power 45 dB  
continuously on  
WALTZ-16 modulated

Sq. sine bell 1.000 sec  
Shifted by -1.000 sec

# Compound 3

| INDEX | FREQUENCY | PPM     | HEIGHT |
|-------|-----------|---------|--------|
| 1     | 30115.1   | 199.699 | 23.2   |
| 2     | 29851.2   | 197.949 | 10.4   |
| 3     | 20652.6   | 136.951 | 10.3   |
| 4     | 20411.9   | 135.355 | 22.2   |
| 5     | 20290.9   | 134.553 | 30.5   |
| 6     | 20266.7   | 134.392 | 19.2   |
| 7     | 19800.7   | 131.302 | 16.4   |
| 8     | 19529.6   | 129.505 | 27.4   |
| 9     | 19502.5   | 129.325 | 46.0   |
| 10    | 19489.3   | 129.237 | 82.8   |
| 11    | 19408.1   | 128.699 | 80.2   |
| 12    | 19404.8   | 128.677 | 86.7   |
| 13    | 19312.6   | 128.066 | 39.9   |
| 14    | 19205.0   | 127.352 | 84.1   |
| 15    | 19107.8   | 126.707 | 82.3   |
| 16    | 19092.3   | 126.605 | 46.9   |
| 17    | 19059.2   | 126.385 | 45.2   |
| 18    | 18999.6   | 125.990 | 40.1   |
| 19    | 18957.1   | 125.708 | 83.5   |
| 20    | 18907.4   | 125.378 | 49.0   |
| 21    | 18845.0   | 124.965 | 44.7   |
| 22    | 18442.5   | 122.296 | 84.0   |
| 23    | 17703.8   | 117.397 | 8402.0 |
| 24    | 14198.5   | 94.153  | 33.2   |
| 25    | 13743.5   | 91.136  | 71.2   |
| 26    | 5634.2    | 37.362  | 82.9   |
| 27    | 5569.1    | 36.930  | 45.2   |

S22

200 180 160 140 120 100 80 60 40 ppm

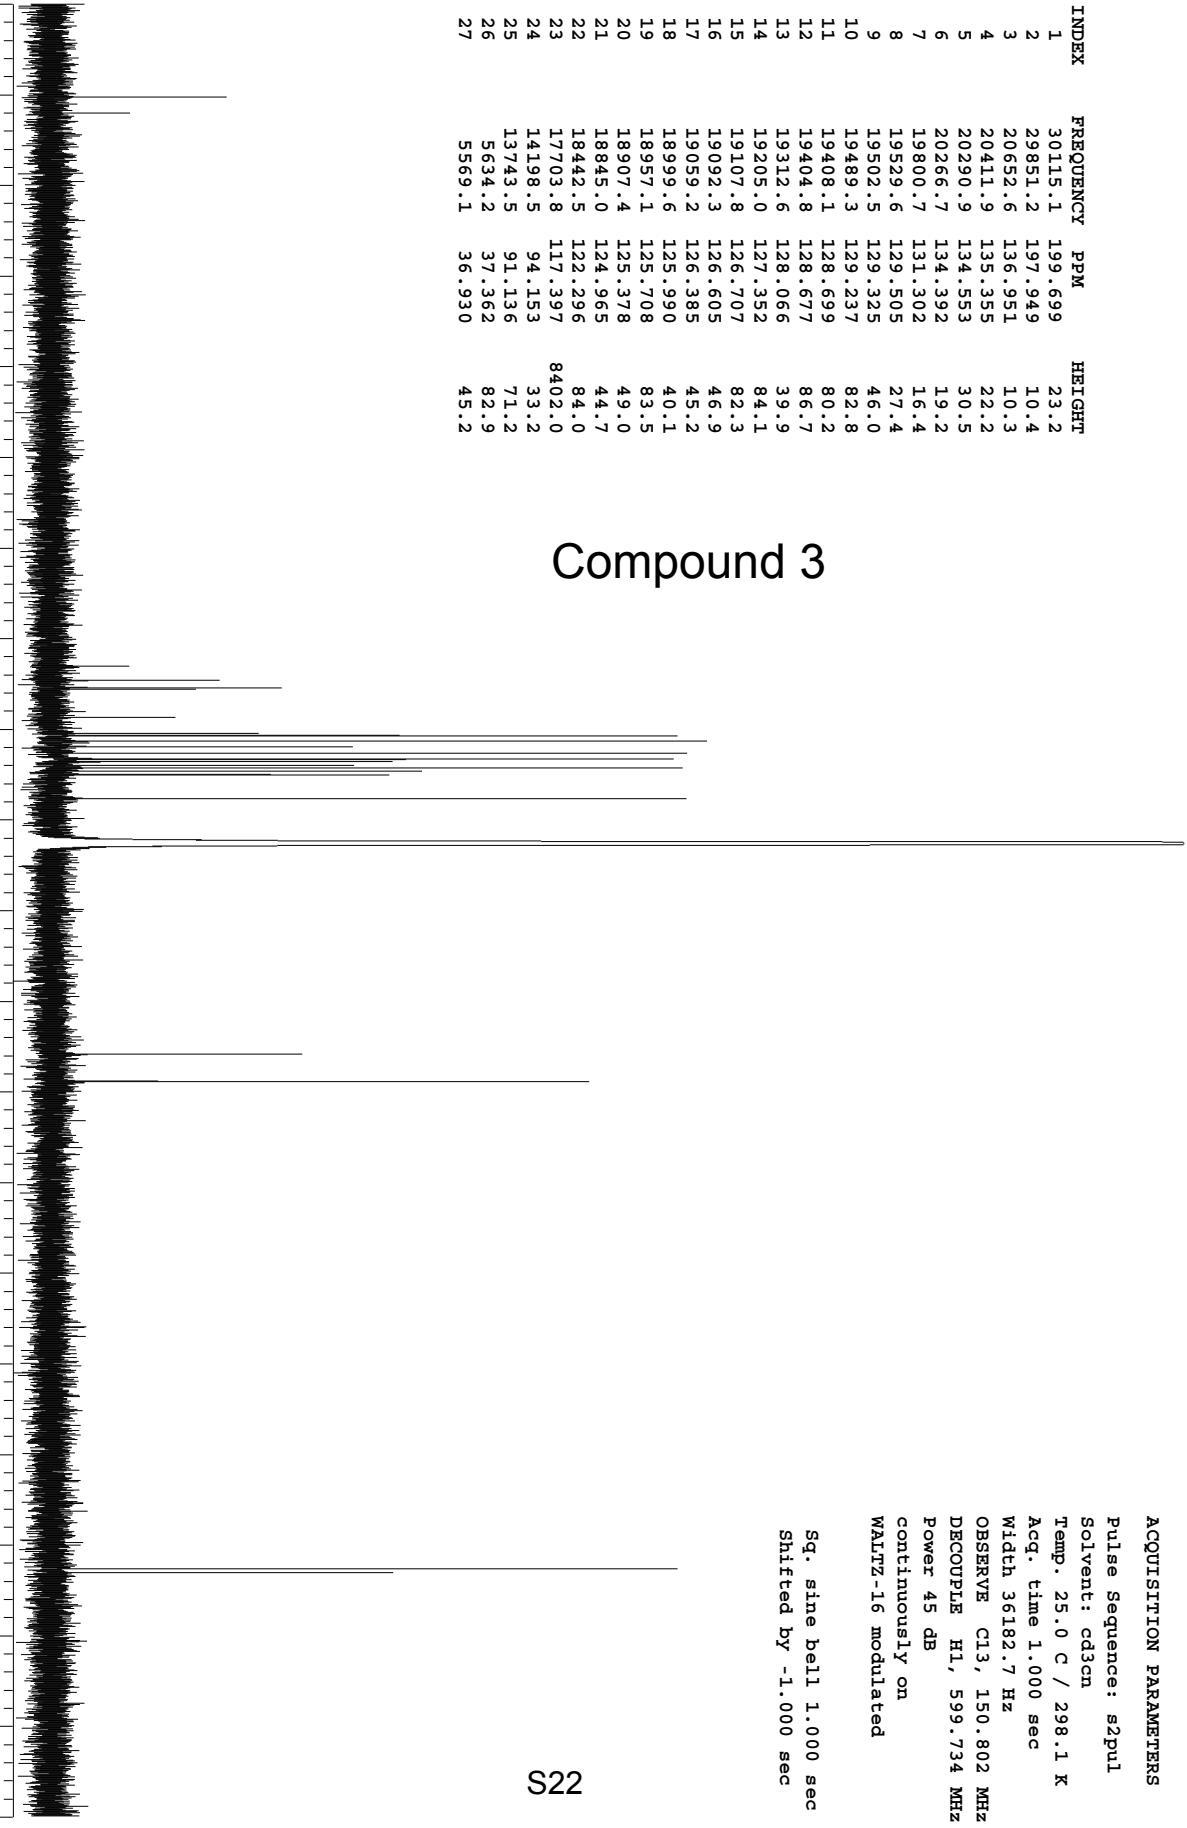

## ACQUISITION PARAMETERS

Pulse Sequence: s2pul  
Solvent: cd3cn  
Temp. 25.0 C / 298.1 K  
Acq. time 1.000 sec  
Width 36182.7 Hz  
OBSERVE C13, 150.802 MHz  
DECOUPLE H1, 599.734 MHz  
Power 45 dB  
continuously on  
WALTZ-16 modulated

Sq. sine bell 1.000 sec  
Shifted by -1.000 sec

| INDEX | FREQUENCY | PPM     | HEIGHT |
|-------|-----------|---------|--------|
| 1     | 20652.6   | 136.951 | 10.3   |
| 2     | 20411.9   | 135.355 | 22.2   |
| 3     | 20290.9   | 134.553 | 30.5   |
| 4     | 20266.7   | 134.392 | 19.2   |
| 5     | 19800.7   | 131.302 | 16.4   |
| 6     | 19529.6   | 129.505 | 27.4   |
| 7     | 19502.5   | 129.325 | 46.0   |
| 8     | 19489.3   | 129.237 | 82.8   |
| 9     | 19408.1   | 128.699 | 80.2   |
| 10    | 19404.8   | 128.677 | 86.7   |
| 11    | 19312.6   | 128.066 | 39.9   |
| 12    | 19205.0   | 127.352 | 84.1   |
| 13    | 19107.8   | 126.707 | 82.3   |
| 14    | 19092.3   | 126.605 | 46.9   |
| 15    | 19059.2   | 126.385 | 45.2   |
| 16    | 18999.6   | 125.990 | 40.1   |
| 17    | 18957.1   | 125.708 | 83.5   |
| 18    | 18907.4   | 125.378 | 49.0   |
| 19    | 18845.0   | 124.965 | 44.7   |
| 20    | 18442.5   | 122.296 | 84.0   |

compound 3

S23

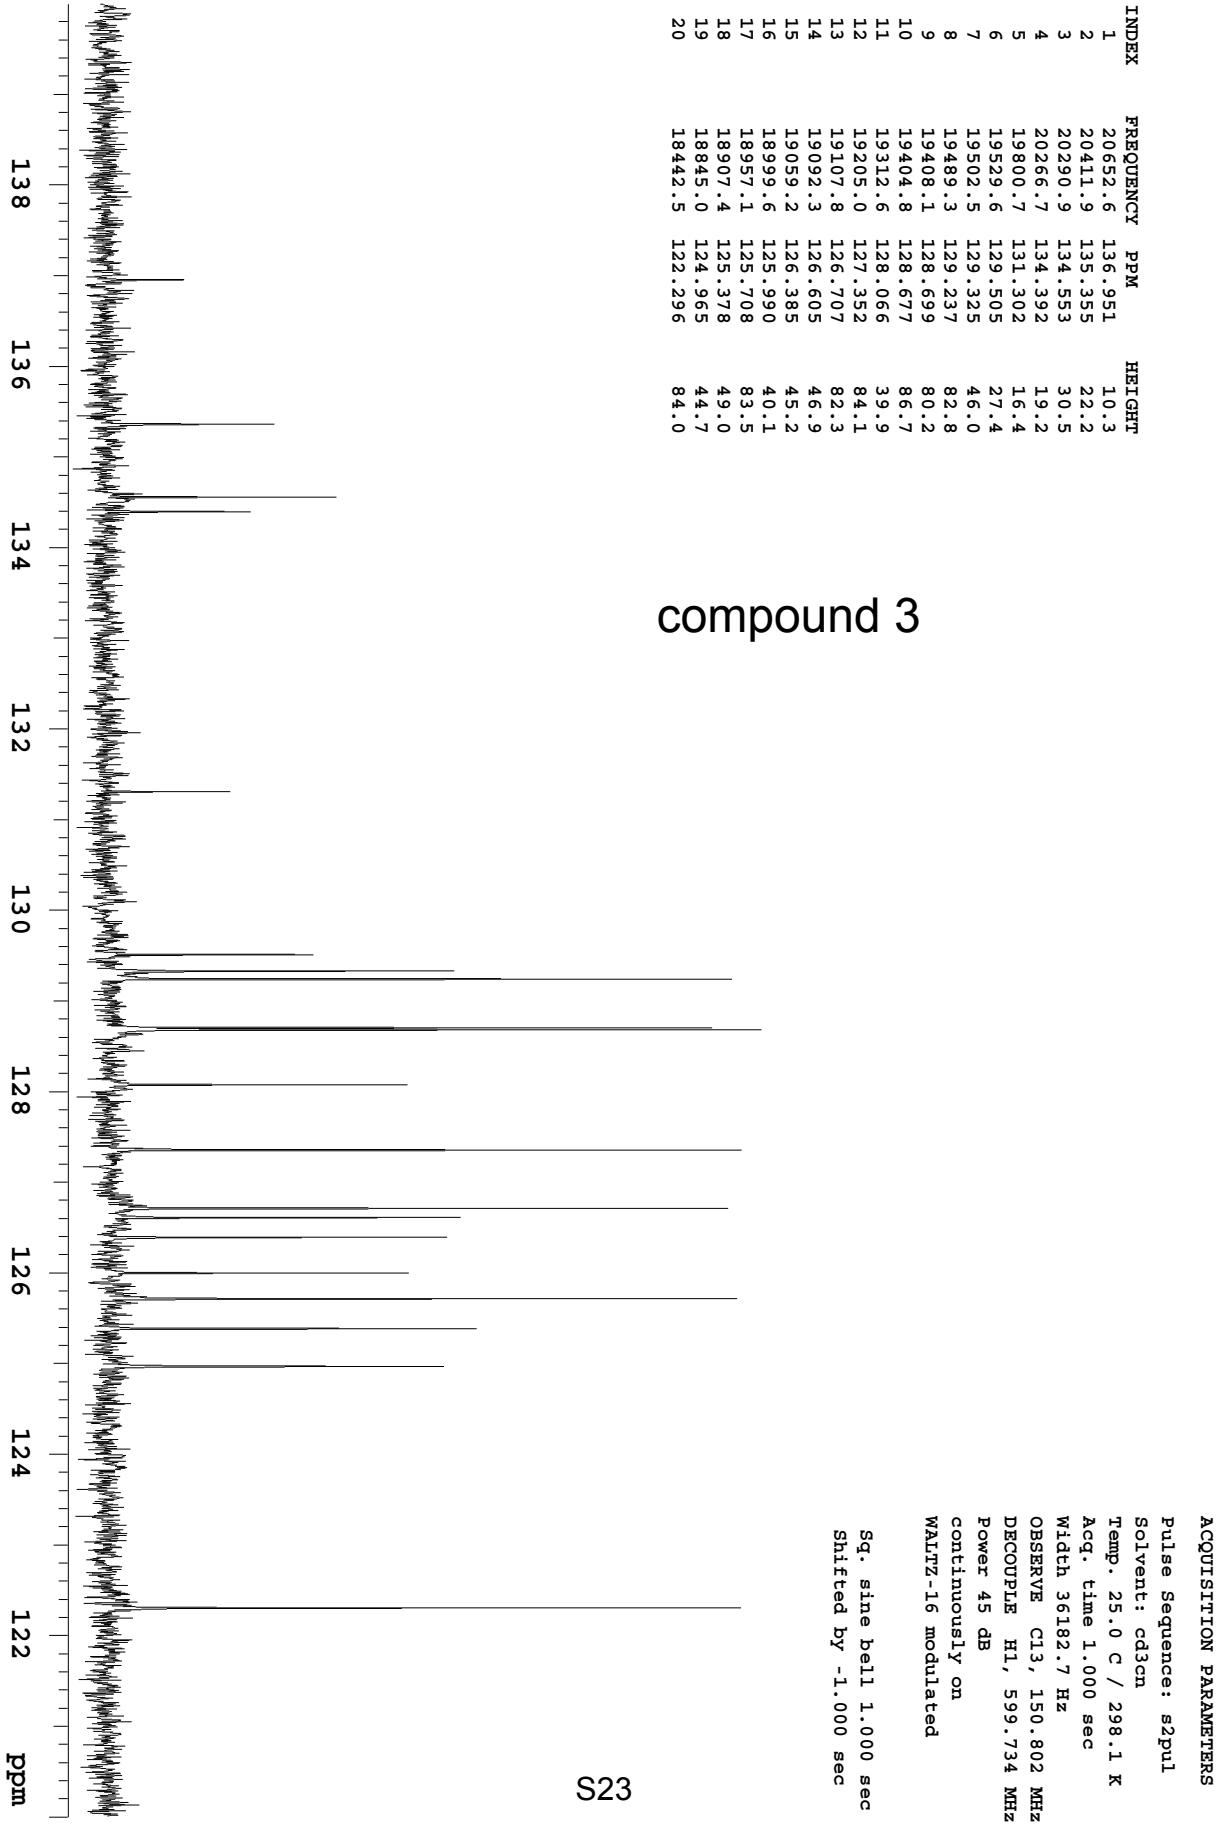

Pulse Sequence: DEPT  
Solvent: cd3cn  
Temp. 25.0 C / 298.1 K  
Acq. time 1.001 sec  
Width 36182.7 Hz  
OBSERVE C13, 150.802 MHz  
DECOUPLE H1, 599.734 MHz  
power 45 dB  
on during acquisition  
off during delay  
WALTZ-16 modulated

Line broadening 1.0 Hz  
Sq. sine bell 1.000 sec  
Shifted by -1.000 sec

compound 3

| INDEX | FREQUENCY | PPM     | HEIGHT |
|-------|-----------|---------|--------|
| 1     | 19503.1   | 129.329 | 27.4   |
| 2     | 19489.8   | 129.241 | 63.1   |
| 3     | 19408.1   | 128.699 | 52.7   |
| 4     | 19405.4   | 128.681 | 67.8   |
| 5     | 19313.2   | 128.069 | 37.8   |
| 6     | 19205.5   | 127.355 | 60.3   |
| 7     | 19108.3   | 126.711 | 63.4   |
| 8     | 19092.9   | 126.609 | 34.4   |
| 9     | 19059.7   | 126.389 | 40.3   |
| 10    | 19000.1   | 125.993 | 39.2   |
| 11    | 18957.6   | 125.712 | 65.2   |
| 12    | 18907.9   | 125.382 | 35.6   |
| 13    | 18845.5   | 124.968 | 35.5   |
| 14    | 18443.0   | 122.299 | 58.5   |
| 15    | 14198.5   | 94.153  | 26.8   |
| 16    | 13743.5   | 91.136  | 55.3   |
| 17    | 5634.8    | 37.365  | -63.2  |
| 18    | 5569.6    | 36.933  | -35.8  |

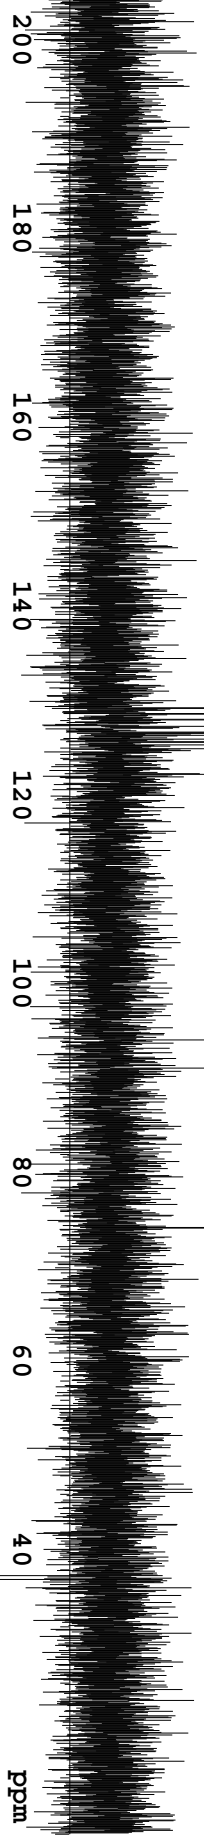



| INDEX | FREQUENCY | PPM     | HEIGHT |
|-------|-----------|---------|--------|
| 1     | 19503.1   | 129.329 | 30.7   |
| 2     | 19489.8   | 129.241 | 63.7   |
| 3     | 19408.7   | 128.703 | 65.3   |
| 4     | 19405.4   | 128.681 | 67.2   |
| 5     | 19313.7   | 128.073 | 40.1   |
| 6     | 19205.5   | 127.355 | 60.6   |
| 7     | 19108.3   | 126.711 | 69.4   |
| 8     | 19092.9   | 126.609 | 36.1   |
| 9     | 19059.7   | 126.389 | 39.0   |
| 10    | 19000.7   | 125.997 | 39.5   |
| 11    | 18957.6   | 125.712 | 64.5   |
| 12    | 18907.9   | 125.382 | 35.1   |
| 13    | 18845.5   | 124.968 | 35.9   |
| 14    | 18443.0   | 122.299 | 60.9   |

### compound 3

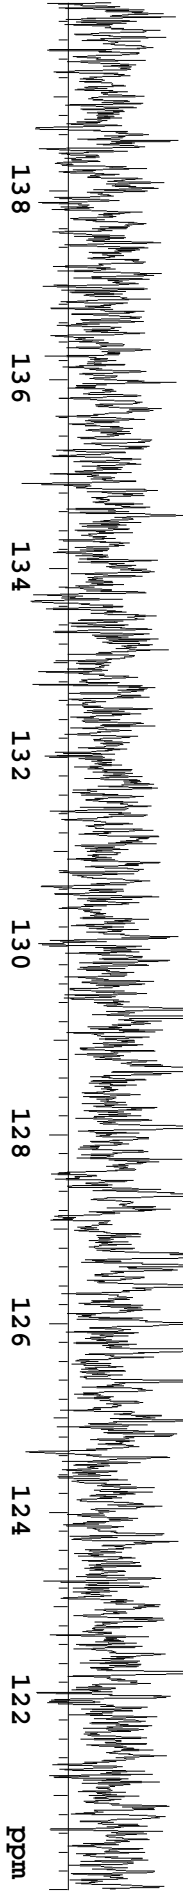

#### ACQUISITION PARAMETERS

Pulse Sequence: DEPT  
 Solvent: cd3cn  
 Temp. 25.0 C / 298.1 K  
 Acq. time 1.001 sec  
 Width 36182.7 Hz  
 OBSERVE C13, 150.802 MHz  
 DECOUPLE H1, 599.734 MHz  
 Power 45 dB  
 on during acquisition  
 off during delay  
 WALTZ-16 modulated  
 Line broadening 1.0 Hz  
 Sq. sine bell 1.000 sec  
 Shifted by -1.000 sec

ACQUISITION PARAMETERS

Pulse Sequence: s2pul  
Solvent: cd3cn  
Temp. 25.0 C / 298.1 K  
Acq. time 2.995 sec  
Width 9611.9 Hz  
OBSERVE H1, 599.7307582 MHz  
DATA PROCESSING  
F1 size 65536

compound 4

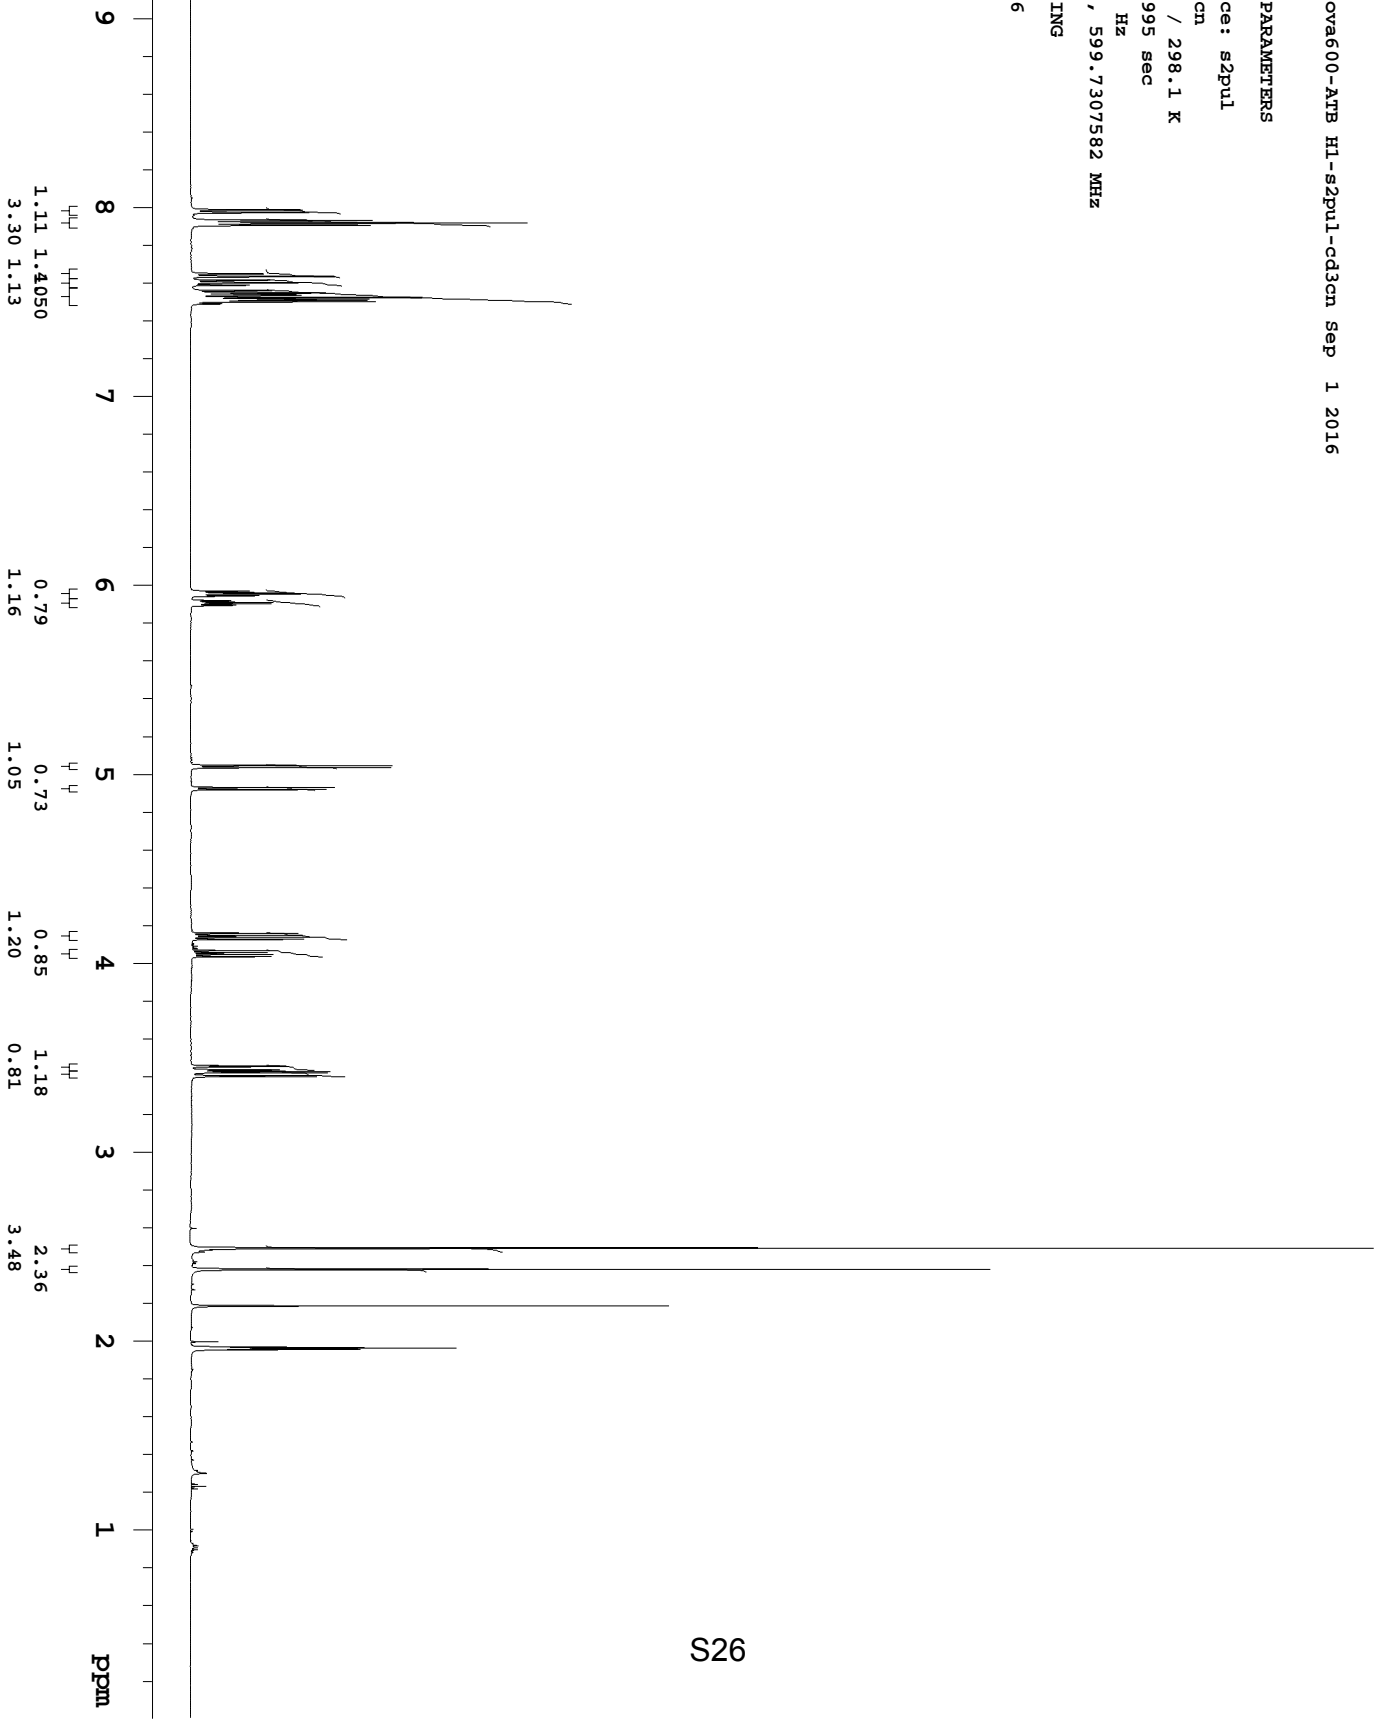

| INDEX | FREQUENCY | PPM     | HEIGHT |
|-------|-----------|---------|--------|
| 1     | 29944.5   | 198.568 | 36.4   |
| 2     | 29895.3   | 198.242 | 50.6   |
| 3     | 20855.7   | 138.298 | 67.8   |
| 4     | 20319.6   | 134.744 | 52.8   |
| 5     | 20301.4   | 134.623 | 31.5   |
| 6     | 20205.3   | 133.986 | 81.4   |
| 7     | 20187.1   | 133.865 | 55.3   |
| 8     | 20093.8   | 133.246 | 42.5   |
| 9     | 19987.3   | 132.540 | 50.8   |
| 10    | 19668.1   | 130.423 | 67.3   |
| 11    | 19608.0   | 130.024 | 105.0  |
| 12    | 19596.9   | 129.951 | 70.0   |
| 13    | 19571.0   | 129.779 | 96.2   |
| 14    | 19567.1   | 129.753 | 69.4   |
| 15    | 19521.3   | 129.450 | 98.0   |
| 16    | 19398.2   | 128.633 | 70.7   |
| 17    | 19362.8   | 128.399 | 104.3  |
| 18    | 19196.6   | 127.297 | 70.4   |
| 19    | 19100.0   | 126.656 | 98.2   |
| 20    | 19086.8   | 126.568 | 75.0   |
| 21    | 18948.2   | 125.649 | 70.4   |
| 22    | 18489.4   | 122.607 | 104.7  |
| 23    | 17835.2   | 118.268 | 1741.0 |
| 24    | 14024.0   | 92.996  | 72.9   |
| 25    | 13989.2   | 92.765  | 50.6   |
| 26    | 5733.0    | 38.017  | 60.0   |
| 27    | 5701.6    | 37.808  | 85.2   |
| 28    | 2938.3    | 19.484  | 101.2  |
| 29    | 2730.7    | 18.108  | 62.4   |

# compound 4

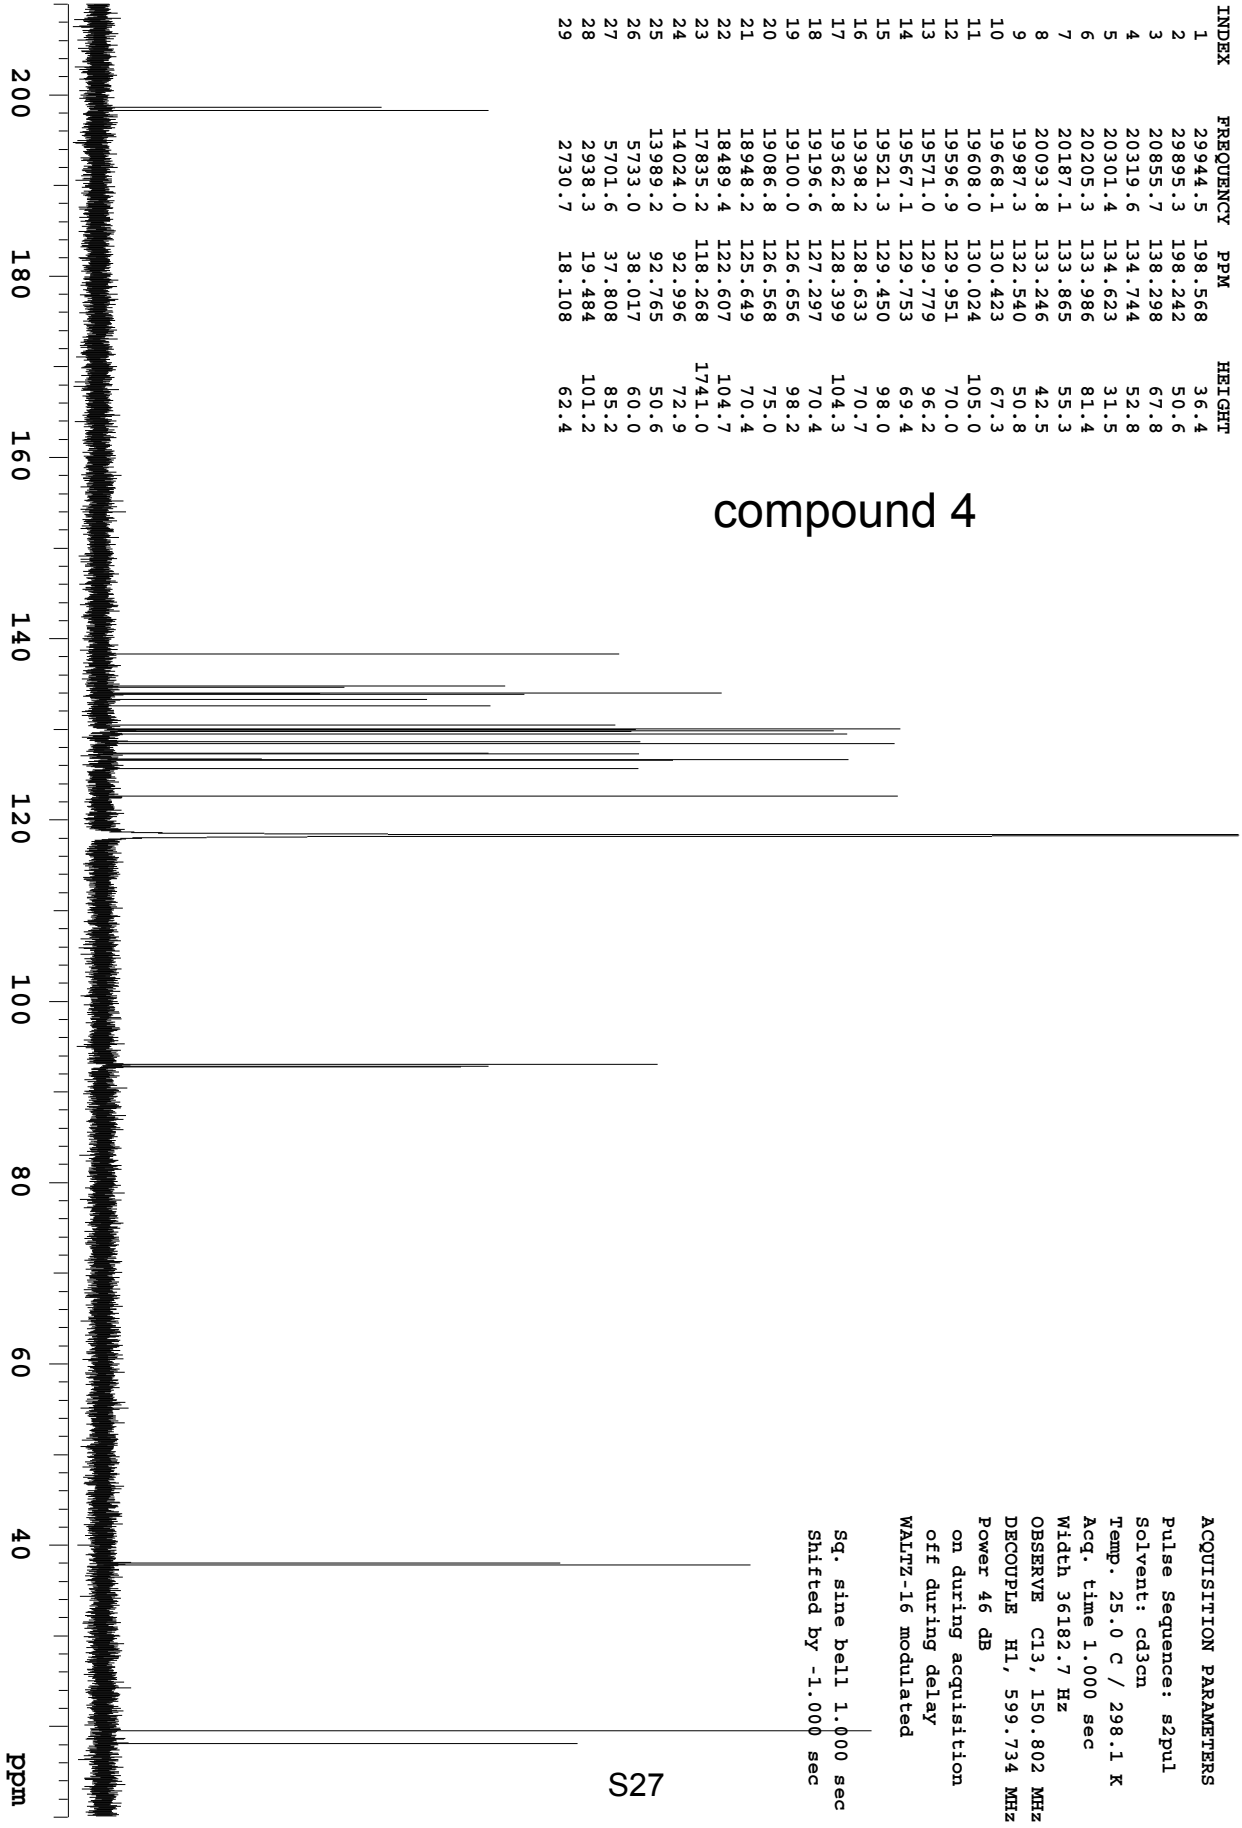

ACQUISITION PARAMETERS  
Pulse Sequence: szpul  
Solvent: cd3cn  
Temp. 25.0 C / 298.1 K  
Acq. time 1.000 sec  
Width 36182.7 Hz  
OBSERVE C13, 150.802 MHz  
DECOUPLE H1, 599.734 MHz  
Power 46 dB  
on during acquisition  
off during delay  
WALTZ-16 modulated

Sq. sine bell 1.000 sec  
Shifted by -1.000 sec

S27

| INDEX | FREQUENCY | PPM     | HEIGHT |
|-------|-----------|---------|--------|
| 1     | 20855.7   | 138.298 | 67.8   |
| 2     | 20319.6   | 134.744 | 52.8   |
| 3     | 20301.4   | 134.623 | 31.5   |
| 4     | 20205.3   | 133.986 | 81.4   |
| 5     | 20187.1   | 133.865 | 55.3   |
| 6     | 20093.8   | 133.246 | 42.5   |
| 7     | 19987.3   | 132.540 | 50.8   |
| 8     | 19668.1   | 130.423 | 67.3   |
| 9     | 19608.0   | 130.024 | 105.0  |
| 10    | 19596.9   | 129.951 | 70.0   |
| 11    | 19571.0   | 129.779 | 96.2   |
| 12    | 19567.1   | 129.753 | 69.4   |
| 13    | 19521.3   | 129.450 | 98.0   |
| 14    | 19398.2   | 128.633 | 70.7   |
| 15    | 19362.8   | 128.399 | 104.3  |
| 16    | 19196.6   | 127.297 | 70.4   |
| 17    | 19100.0   | 126.656 | 98.2   |
| 18    | 19086.8   | 126.568 | 75.0   |
| 19    | 18948.2   | 125.649 | 70.4   |
| 20    | 18489.4   | 122.607 | 104.7  |

# compound 4

ACQUISITION PARAMETERS  
Pulse Sequence: s2pul  
Solvent: cd3cn  
Temp. 25.0 C / 298.1 K  
Acq. time 1.000 sec  
Width 36182.7 Hz  
OBSERVE C13, 150.802 MHz  
DECOUPLE H1, 599.734 MHz  
Power 46 dB  
on during acquisition  
off during delay  
WALTZ-16 modulated

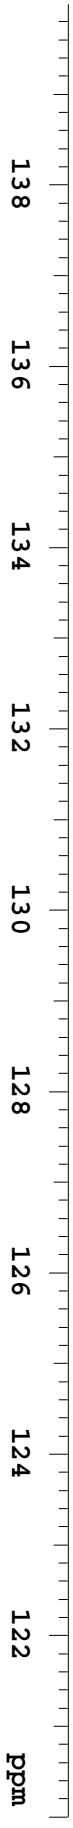

| INDEX | FREQUENCY | PPM     | HEIGHT |
|-------|-----------|---------|--------|
| 1     | 19608.6   | 130.028 | 40.1   |
| 2     | 19597.5   | 129.955 | 26.9   |
| 3     | 19571.6   | 129.783 | 38.0   |
| 4     | 19568.3   | 129.761 | 26.9   |
| 5     | 19521.9   | 129.454 | 37.6   |
| 6     | 19398.8   | 128.637 | 27.4   |
| 7     | 19363.4   | 128.403 | 33.4   |
| 8     | 19197.3   | 127.301 | 24.8   |
| 9     | 19101.2   | 126.664 | 37.2   |
| 10    | 19087.4   | 126.572 | 27.4   |
| 11    | 18948.8   | 125.653 | 25.7   |
| 12    | 18490.0   | 122.611 | 37.5   |
| 13    | 14024.6   | 93.000  | 33.7   |
| 14    | 13989.8   | 92.769  | 21.3   |
| 15    | 5733.6    | 38.021  | -33.1  |
| 16    | 5702.2    | 37.812  | -49.6  |
| 17    | 2938.9    | 19.488  | 36.1   |
| 18    | 2731.3    | 18.112  | 26.3   |

# compound 4

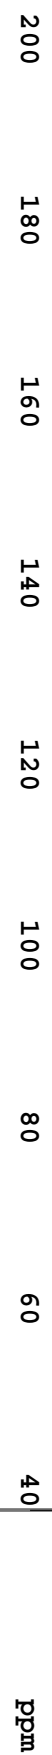

ACQUISITION PARAMETERS  
Pulse Sequence: DEPT  
Solvent: cd3cn  
Temp. 25.0 C / 298.1 K  
Acq. time 1.001 sec  
Width 36182.7 Hz  
OBSERVE C13, 150.802 MHz  
DECOUPLE H1, 599.734 MHz  
Power 46 dB  
off during acquisition  
on during delay  
WALTZ-16 modulated  
Line broadening 1.0 Hz  
Sq. sine bell 1.000 sec  
Shifted by -1.000 sec

| INDEX | FREQUENCY | PPM     | HEIGHT |
|-------|-----------|---------|--------|
| 1     | 19608.6   | 130.028 | 39.2   |
| 2     | 19597.5   | 129.955 | 27.6   |
| 3     | 19571.6   | 129.783 | 39.0   |
| 4     | 19568.3   | 129.761 | 27.9   |
| 5     | 19521.9   | 129.454 | 37.9   |
| 6     | 19398.8   | 128.637 | 27.7   |
| 7     | 19363.4   | 128.403 | 35.0   |
| 8     | 19197.3   | 127.301 | 25.8   |
| 9     | 19100.6   | 126.660 | 38.5   |
| 10    | 19087.4   | 126.572 | 28.0   |
| 11    | 18948.8   | 125.653 | 25.7   |
| 12    | 18490.0   | 122.611 | 38.6   |

## compound 4

ACQUISITION PARAMETERS  
Pulse Sequence: DEPT  
Solvent: cd3cn  
Temp. 25.0 C / 298.1 K  
Acq. time 1.001 sec  
Width 36182.7 Hz  
OBSERVE C13, 150.802 MHz  
DECOUPLE H1, 599.734 MHz  
Power 46 dB  
on during acquisition  
off during delay  
WALTZ-16 modulated

Line broadening 1.0 Hz  
Sq. sine bell 1.000 sec  
Shifted by -1.000 sec

S30

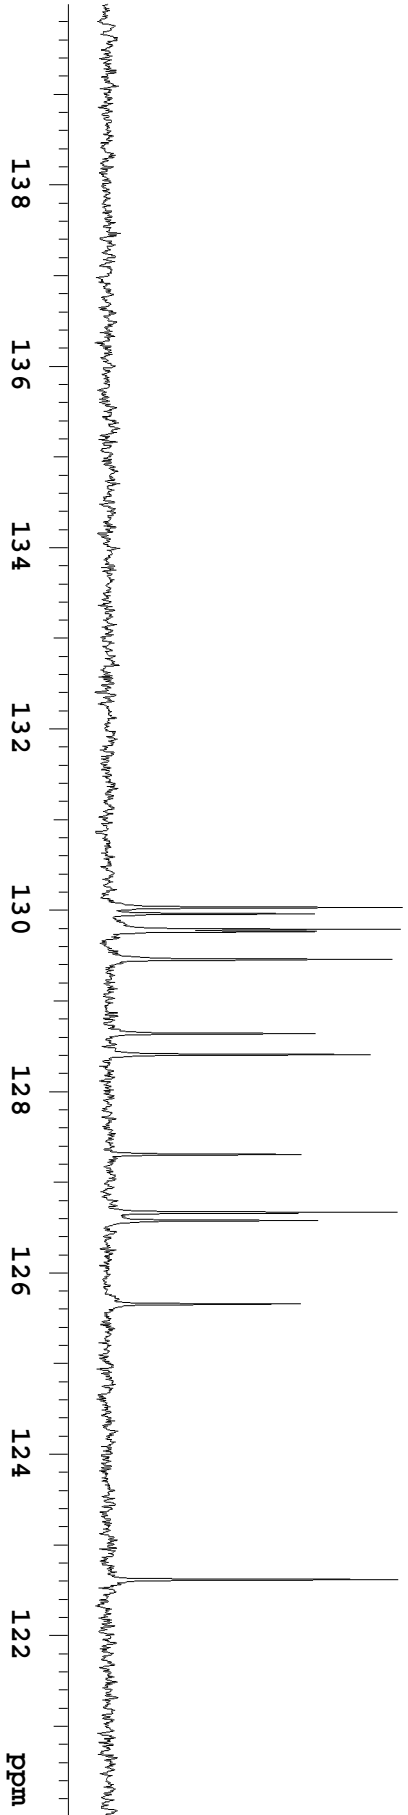

# compound 5

ACQUISITION PARAMETERS  
Pulse Sequence: s2pul  
Solvent: cd3cn  
Temp. 25.0 C / 298.1 K  
Acq. time 2.595 sec  
Width 9611.9 Hz  
OBSERVE H1, 599.731 MHz

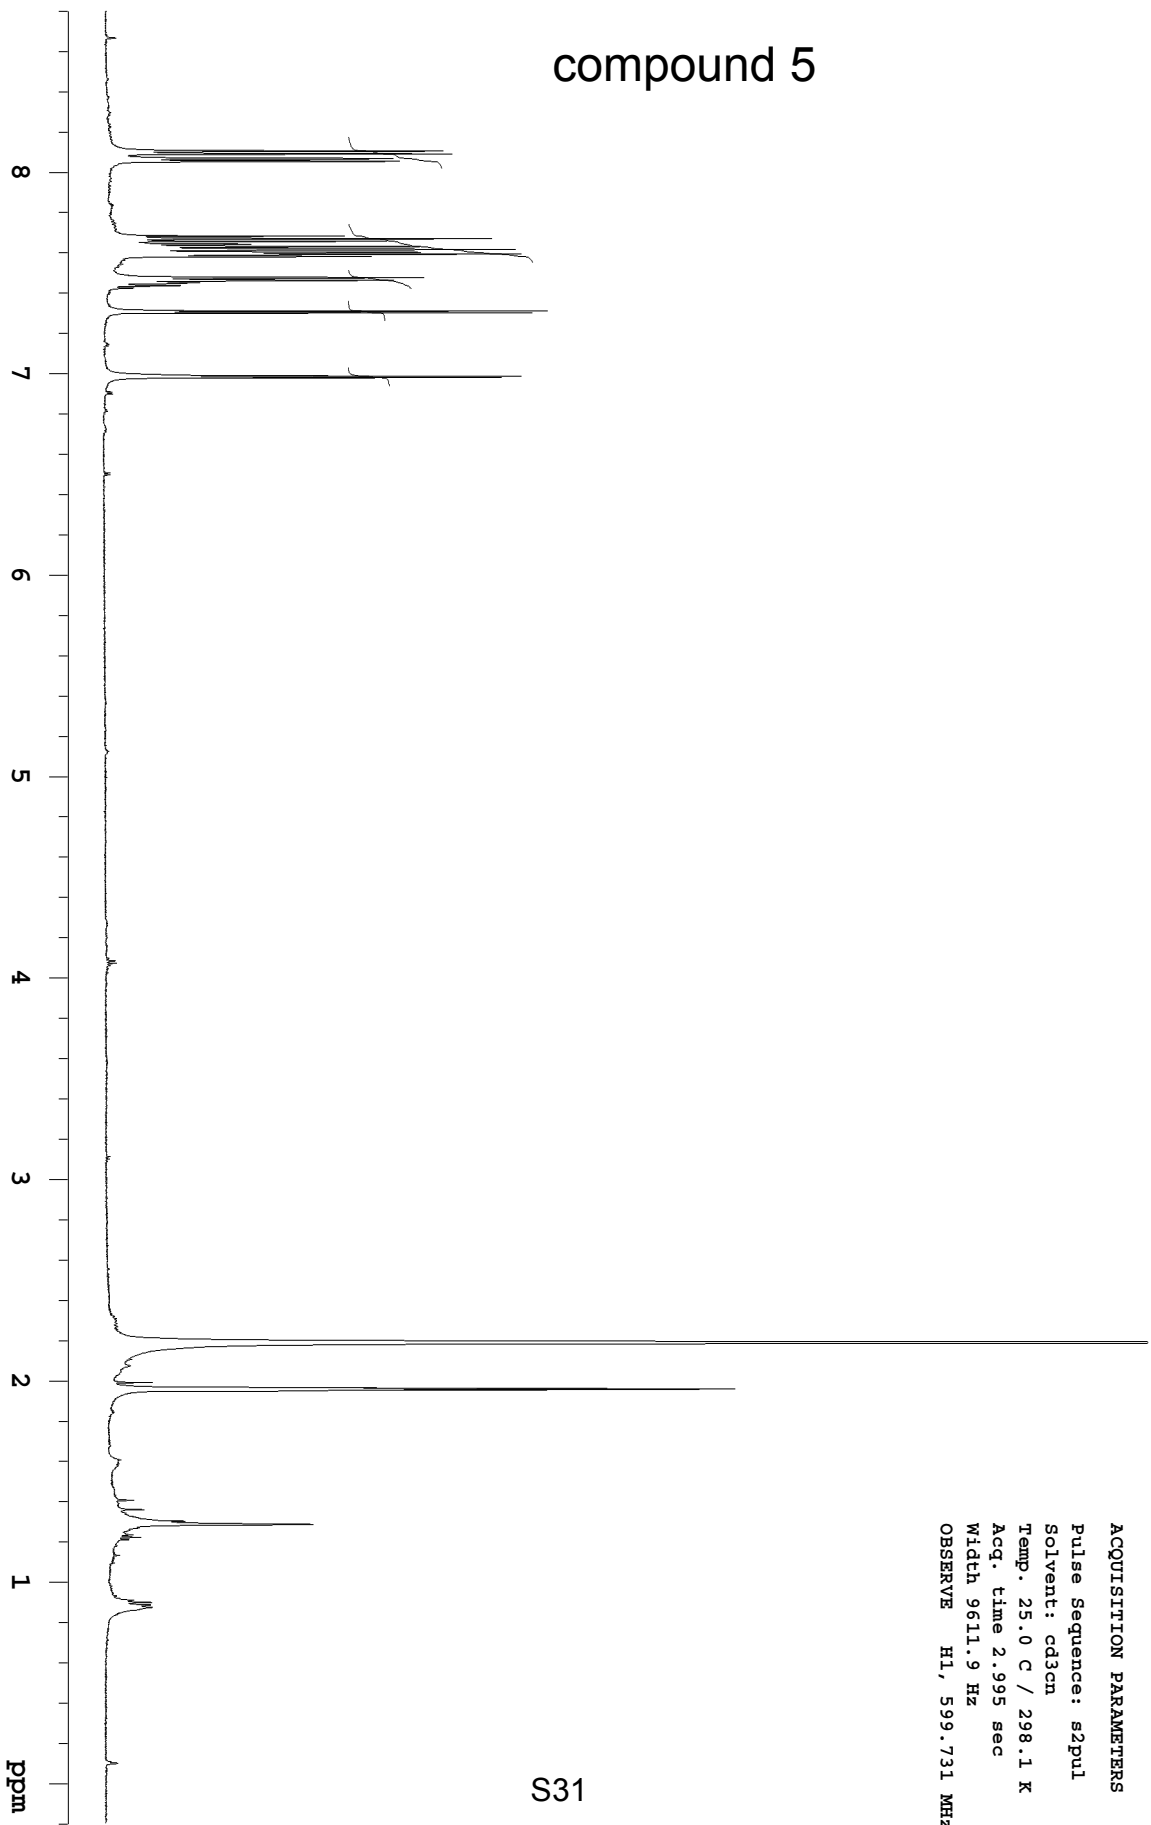

S31

ACQUISITION PARAMETERS

Pulse Sequence: s2pul  
Solvent: cd3cn  
Temp. 25.0 C / 298.1 K  
Acq. time 1.000 sec  
Width 36182.7 Hz  
OBSERVE C13, 150.802 MHz  
DECOUPLE H1, 599.734 MHz  
Power 46 dB  
on during acquisition  
off during delay  
WALTZ-16 modulated  
Sq. sine bell 1.000 sec  
Shifted by -1.000 sec

| INDEX | FREQUENCY | PPM     | HEIGHT |
|-------|-----------|---------|--------|
| 1     | 28771.0   | 190.787 | 30.1   |
| 2     | 20610.9   | 136.675 | 27.0   |
| 3     | 20406.7   | 135.321 | 54.1   |
| 4     | 20333.8   | 134.837 | 71.9   |
| 5     | 19749.1   | 130.960 | 94.7   |
| 6     | 19605.6   | 130.008 | 49.1   |
| 7     | 19529.4   | 129.503 | 97.1   |
| 8     | 19385.3   | 128.548 | 97.7   |
| 9     | 19290.3   | 127.918 | 88.3   |
| 10    | 19160.0   | 127.054 | 99.1   |
| 11    | 19097.6   | 126.640 | 94.4   |
| 12    | 18601.3   | 123.349 | 90.3   |
| 13    | 17837.7   | 118.286 | 1888.1 |
| 14    | 17025.6   | 112.900 | 105.7  |

compound 5

S32

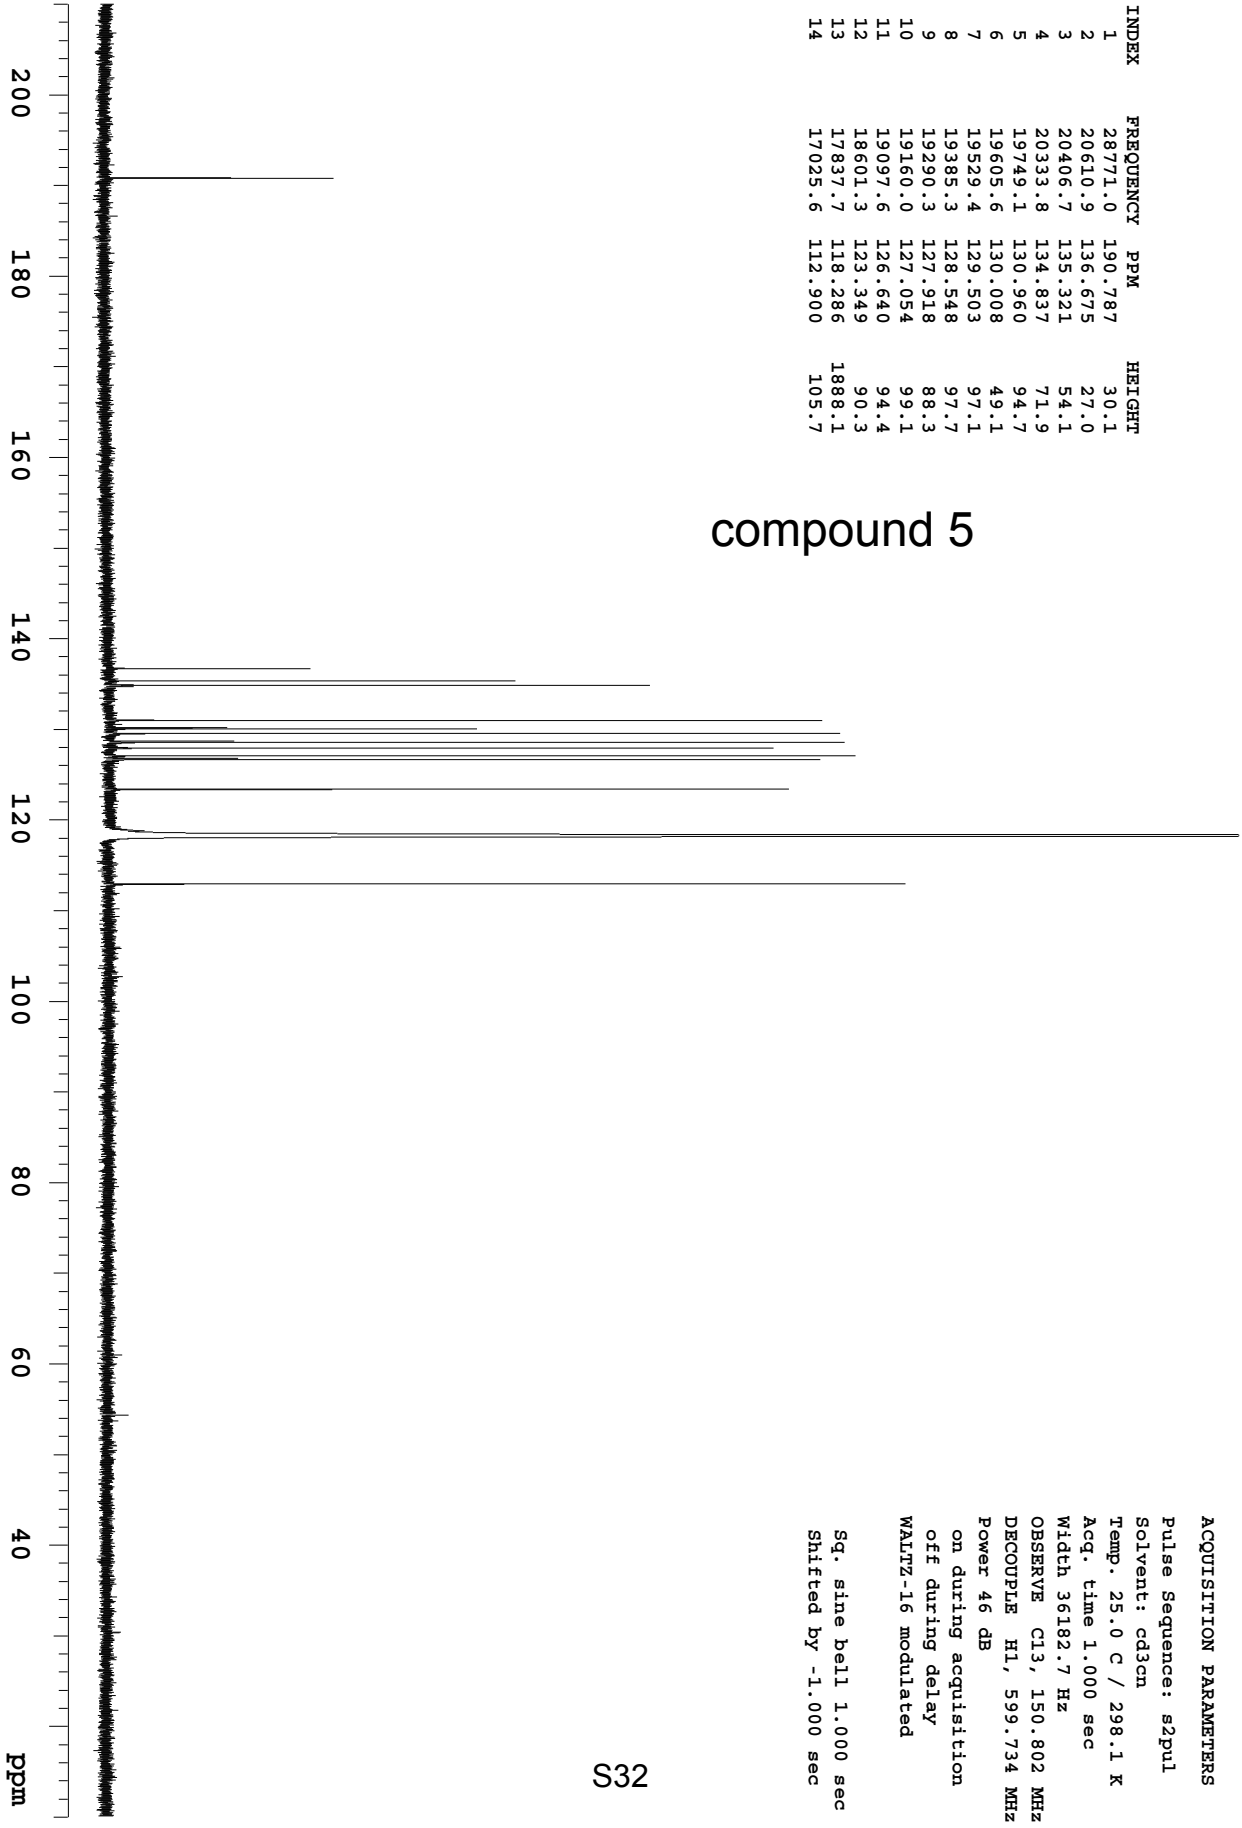



| INDEX | FREQUENCY | PPM     | HEIGHT |
|-------|-----------|---------|--------|
| 1     | 20333.8   | 134.837 | 45.6   |
| 2     | 19749.1   | 130.960 | 83.0   |
| 3     | 19529.4   | 129.503 | 83.0   |
| 4     | 19385.3   | 128.548 | 65.4   |
| 5     | 19290.3   | 127.918 | 78.3   |
| 6     | 19160.0   | 127.054 | 76.4   |
| 7     | 19097.6   | 126.640 | 79.1   |
| 8     | 18601.3   | 123.349 | 66.5   |
| 9     | 17025.6   | 112.900 | 48.1   |

# compound 5

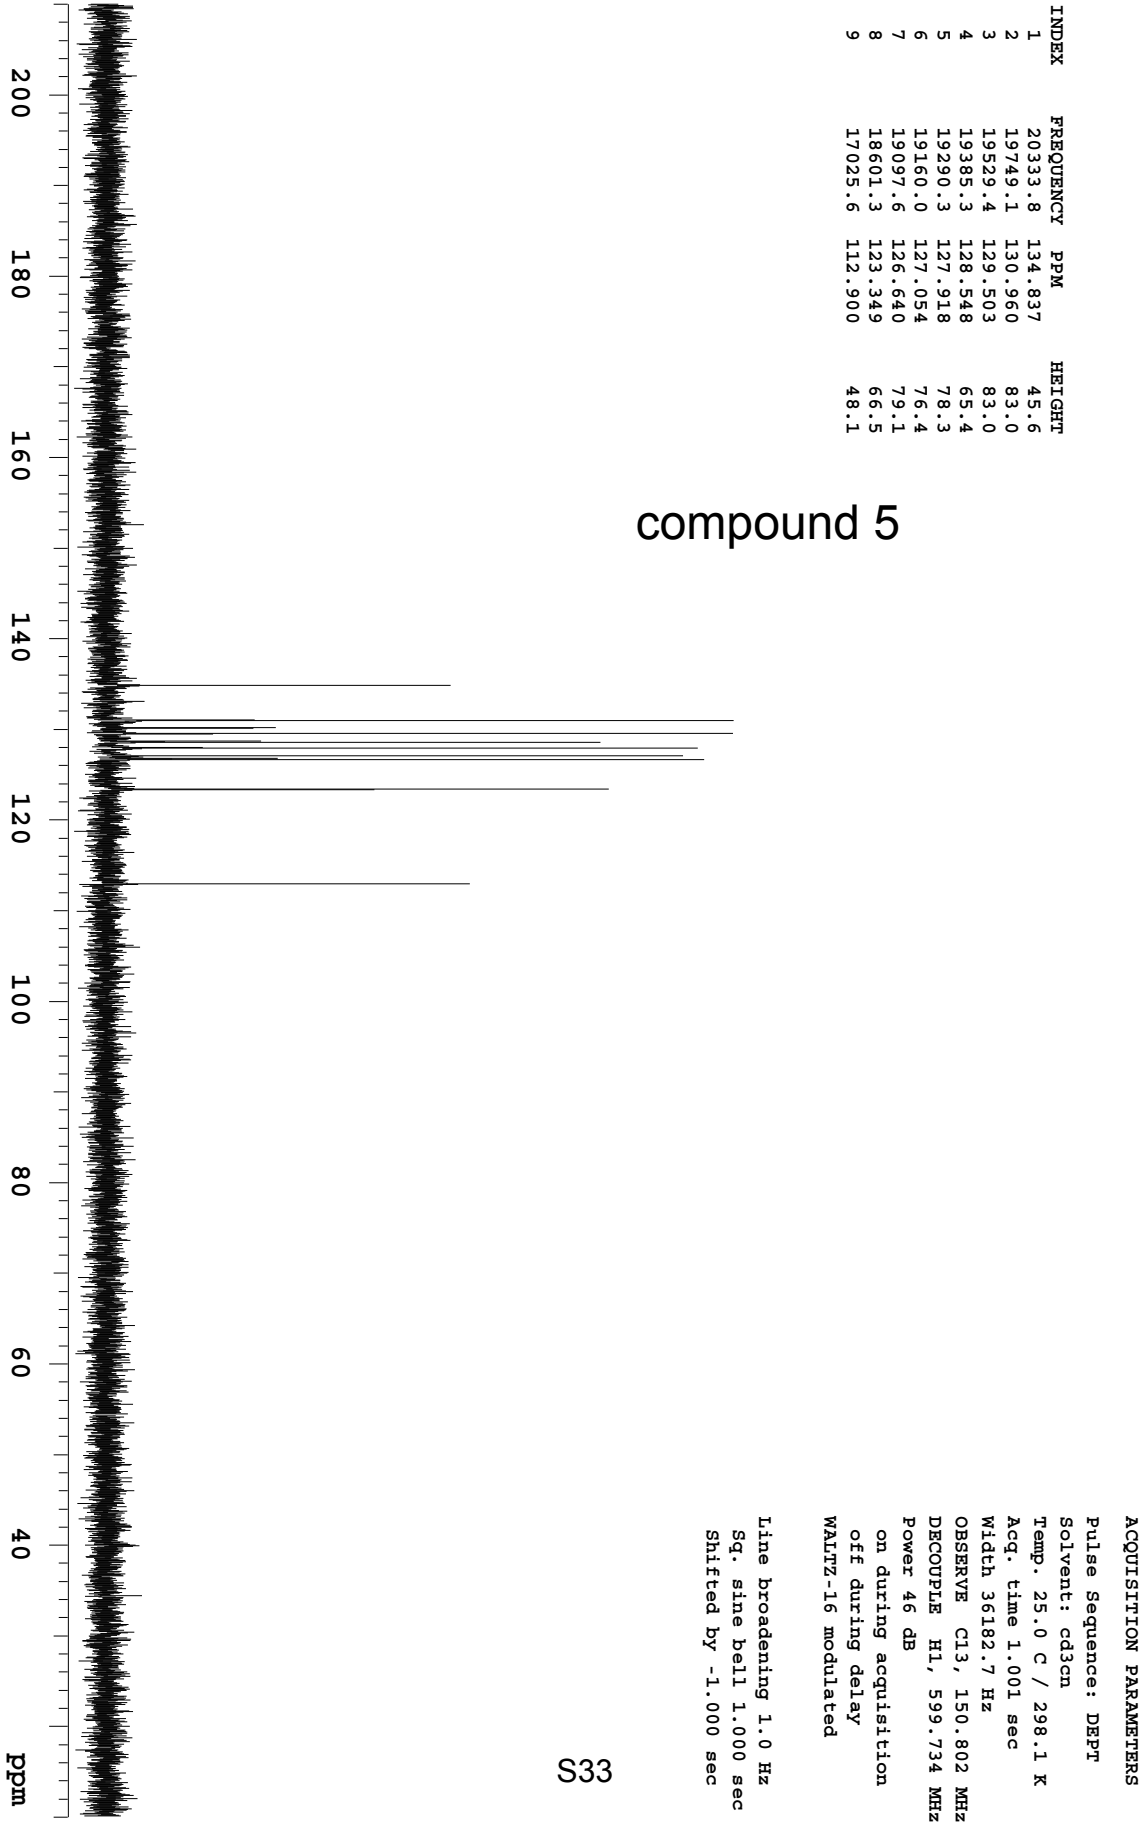

## ACQUISITION PARAMETERS

Pulse Sequence: DEPT  
 Solvent: cd3cn  
 Temp. 25.0 C / 298.1 K  
 Acq. time 1.001 sec  
 Width 36182.7 Hz  
 OBSERVE C13, 150.802 MHz  
 DECOUPLE H1, 599.734 MHz  
 Power 46 dB  
 on during acquisition  
 off during delay  
 WALTZ-16 modulated

Line broadening 1.0 Hz  
 Sq. sine bell 1.000 sec  
 Shifted by -1.000 sec

S33

ppm

ACQUISITION PARAMETERS

Pulse Sequence: s2pul

Solvent: cd3cn

Temp. 25.0 C / 298.1 K

Acq. time 2.995 sec

Width 9611.9 Hz

OBSERVE H1, 599.7307582 MHz

DATA PROCESSING

FT size 65536

# compound 6

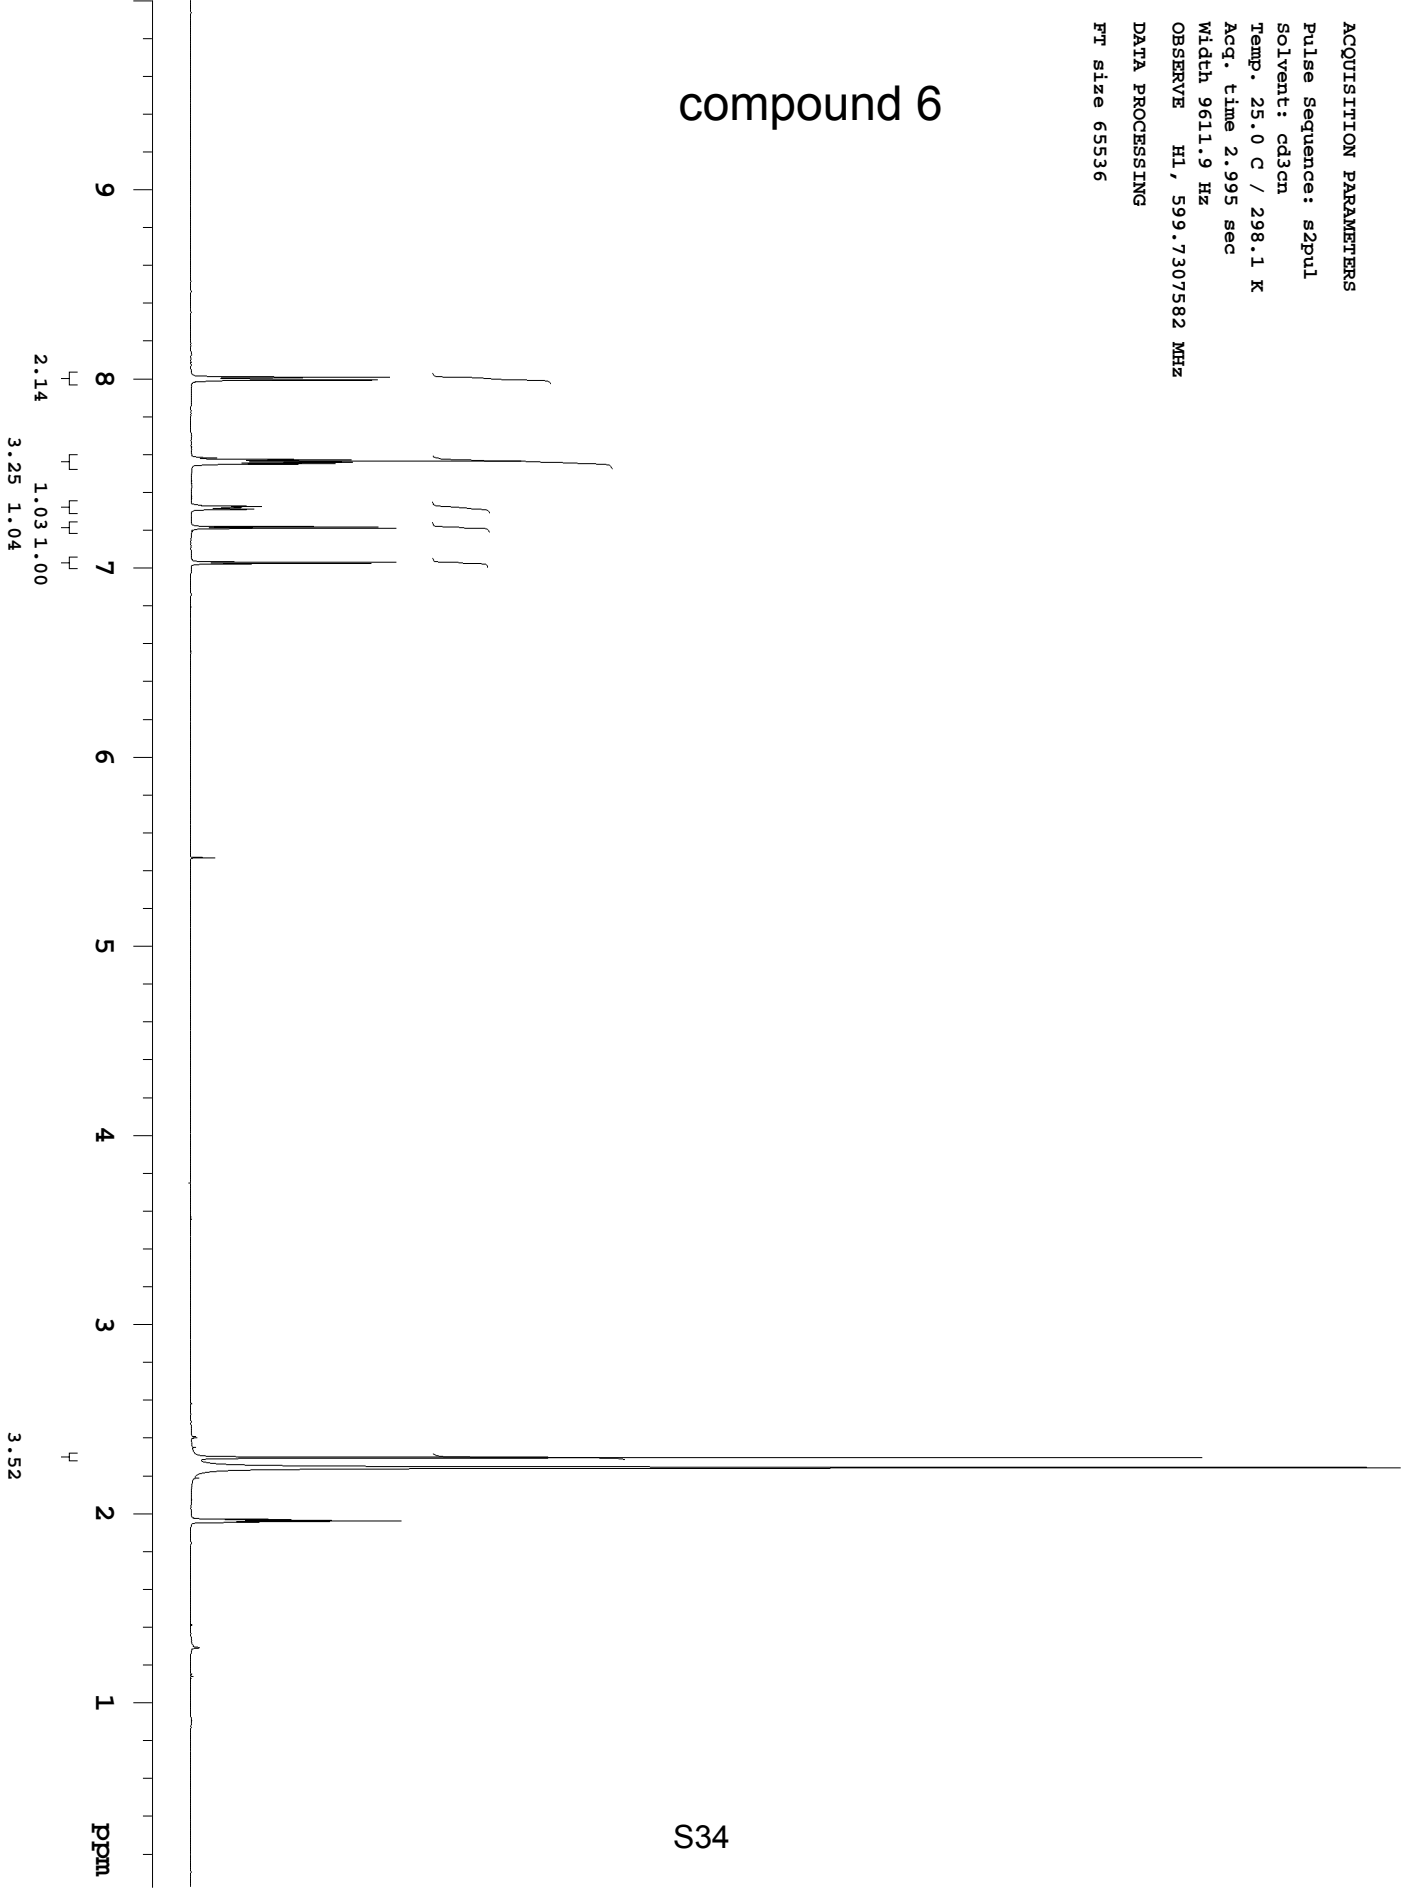

ACQUISITION PARAMETERS

Pulse Sequence: s2pul  
 Solvent: cd3cn  
 Temp. 25.0 C / 298.1 K  
 Acq. time 1.000 sec  
 Width 36182.7 Hz  
 OBSERVE C13, 150.802 MHz  
 DECOUPLE H1, 599.734 MHz  
 Power 46 dB  
 on during acquisition  
 off during delay  
 WALTZ-16 modulated

| INDEX | FREQUENCY | PPM     | HEIGHT |
|-------|-----------|---------|--------|
| 1     | 28628.5   | 189.842 | 43.1   |
| 2     | 20391.1   | 135.218 | 68.4   |
| 3     | 20211.7   | 134.028 | 31.9   |
| 4     | 20193.5   | 133.907 | 70.4   |
| 5     | 20173.1   | 133.772 | 68.1   |
| 6     | 19688.3   | 130.557 | 95.9   |
| 7     | 19668.4   | 130.425 | 64.9   |
| 8     | 19548.1   | 129.627 | 101.5  |
| 9     | 19486.8   | 129.221 | 98.0   |
| 10    | 19399.0   | 128.639 | 102.6  |
| 11    | 19148.9   | 126.980 | 89.1   |
| 12    | 18497.4   | 122.660 | 105.7  |
| 13    | 17836.0   | 118.274 | 1457.0 |
| 14    | 17116.1   | 113.500 | 97.0   |
| 15    | 2717.7    | 18.022  | 88.9   |

compound 6

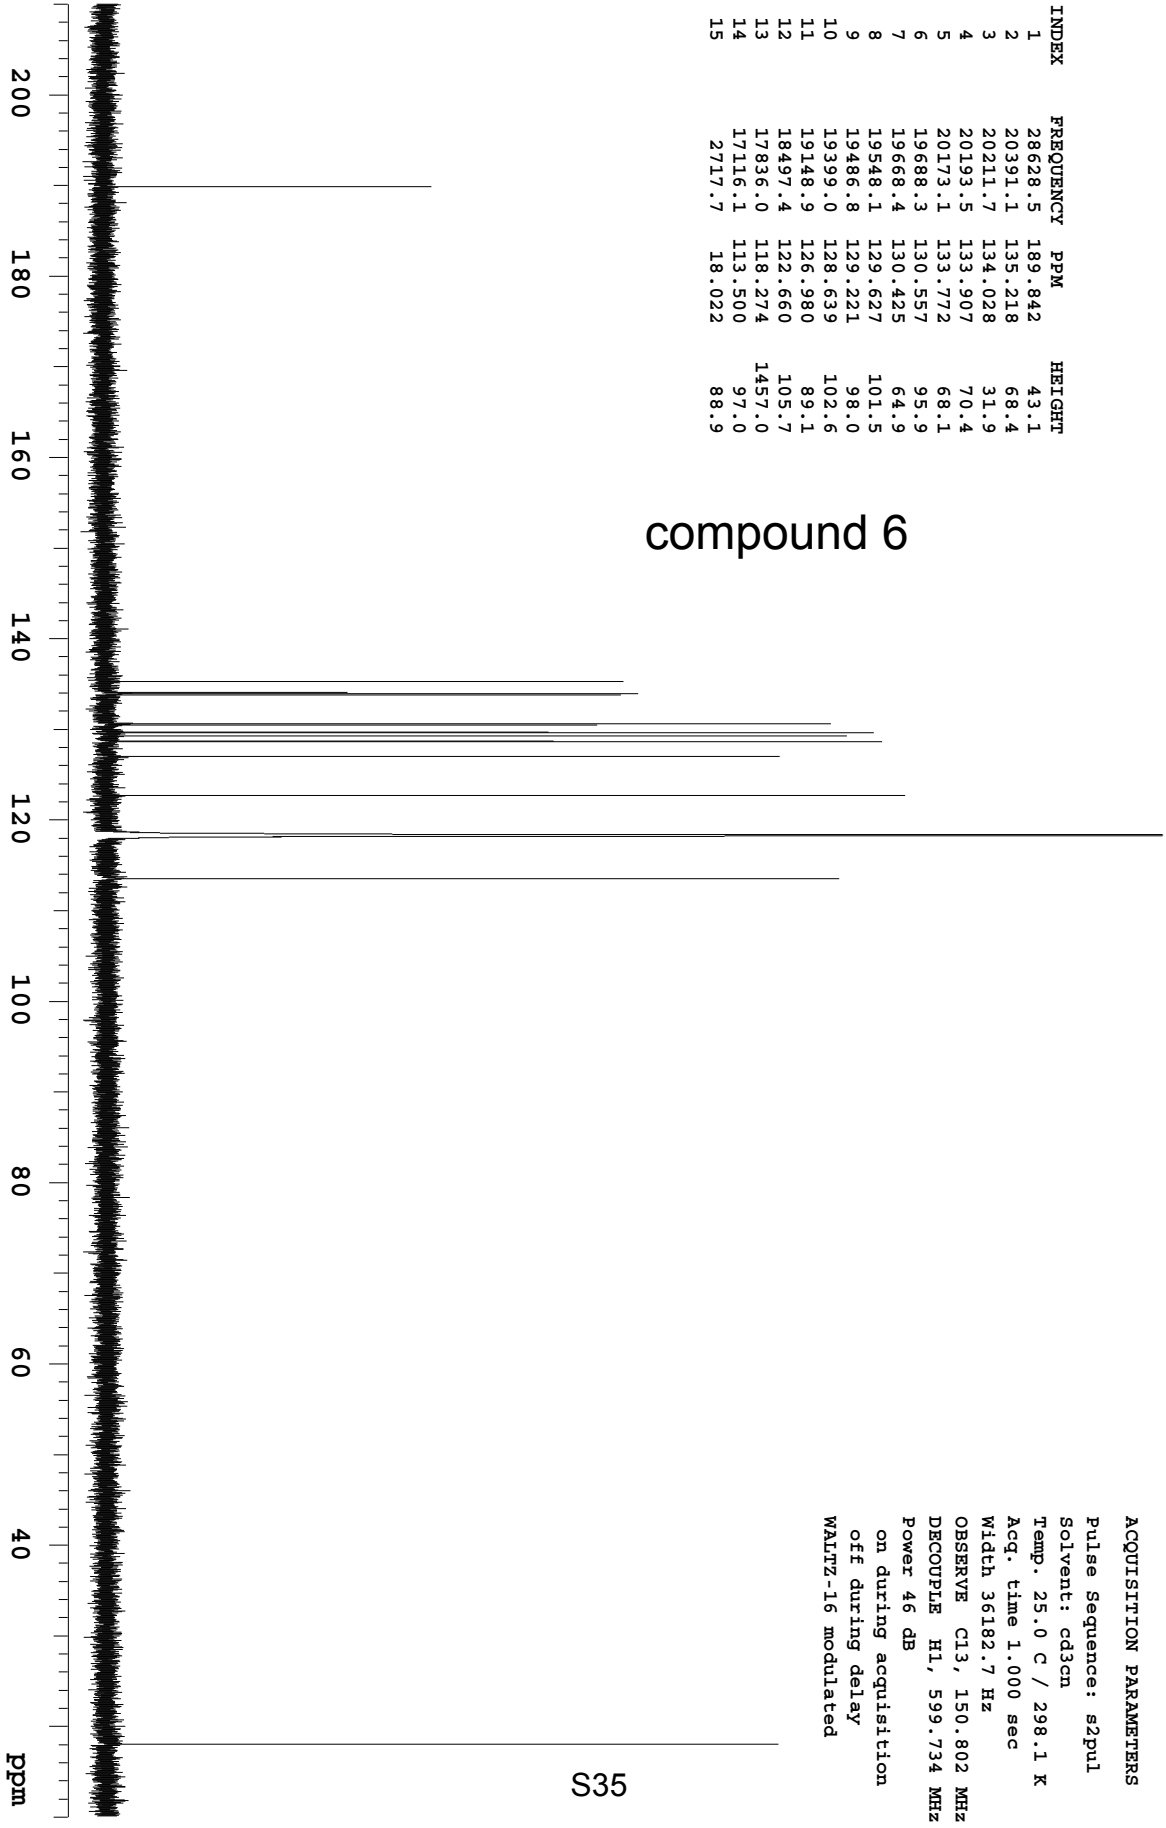

S35

## ACQUISITION PARAMETERS

Pulse Sequence: DEPT  
Solvent: cd3cn  
Temp. 25.0 C / 298.1 K  
Acq. time 1.001 sec  
Width 36182.7 Hz  
OBSERVE C13, 150.802 MHz  
DECOUPLE H1, 599.734 MHz  
Power 46 dB  
on during acquisition  
off during delay  
WALTZ-16 modulated

| INDEX | FREQUENCY | PPM     | HEIGHT |
|-------|-----------|---------|--------|
| 1     | 20193.5   | 133.907 | 39.4   |
| 2     | 19688.3   | 130.557 | 76.5   |
| 3     | 19548.1   | 129.627 | 73.7   |
| 4     | 19486.8   | 129.221 | 76.9   |
| 5     | 19399.0   | 128.639 | 76.3   |
| 6     | 19148.9   | 126.980 | 74.2   |
| 7     | 18497.4   | 122.660 | 80.0   |
| 8     | 17116.1   | 113.500 | 45.3   |
| 9     | 2717.7    | 18.022  | 70.0   |

compound 6

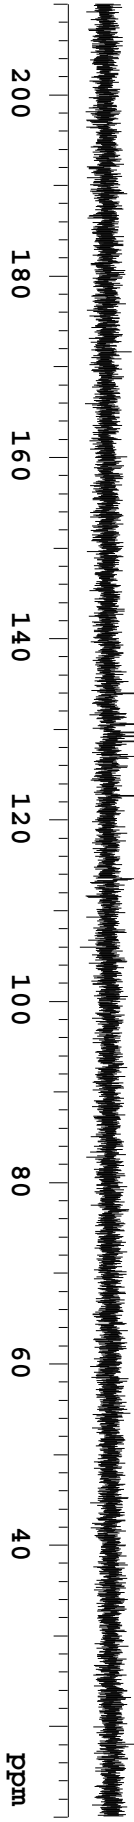

S36
